# Supplementary material for: Exceptionally preserved ‘skin’ in an Early Cretaceous fish from Colombia
Source: PeerJ. 2020 Jul 8;8:e9479. doi: 10.7717/peerj.9479 (PMC7353916; doi:10.7717/peerj.9479)
Supplement: Supplemental Information 6 [file peerj-08-9479-s006.xlsx]

## Sheet: Skin 01 N_0_GraphsData.txt
Tof-SIMS Analyses
Sample: Skin 01, fresh sample.							Sample: Skin 02, HCL treated.
Binning: 20 channels							Binning: 20 channels
Deadtime Correction: on	Negative Ions		Positive Ions				Negative Ions			Positive Ions
Channel	Mass (u)	Intensity	Channel	Mass (u)	Intensity		Channel	Mass (u)	Intensity	Channel	Mass (u)	Intensity
34110	1.00059	8	34457	1.00054	1		33531	1.00056	20	33988	1.00054	0
34130	1.00173	65	34477	1.00167	0		33551	1.00172	72	34008	1.00169	0
34150	1.00287	235	34497	1.0028	0		33571	1.00288	240	34028	1.00283	1
34170	1.00401	166	34517	1.00392	3		33591	1.00404	201	34048	1.00397	2
34190	1.00515	207	34537	1.00505	7		33611	1.00519	151	34068	1.00511	1
34210	1.00629	22	34557	1.00618	52		33631	1.00635	13	34088	1.00626	21
34230	1.00743	18	34577	1.00731	8509		33651	1.00751	120	34108	1.0074	1945
34250	1.00857	425979	34597	1.00844	6083		33671	1.00867	981296	34128	1.00855	8319
34270	1.00971	2219011	34617	1.00957	60		33691	1.00984	1684220	34148	1.00969	107
34290	1.01086	35000	34637	1.0107	13		33711	1.011	19583	34168	1.01084	13
34310	1.012	4615	34657	1.01184	2		33731	1.01216	1905	34188	1.01199	2
34330	1.01314	1203	34677	1.01297	2		33751	1.01332	300	34208	1.01314	1
34350	1.01429	401	34697	1.0141	2		33771	1.01449	100	34228	1.01428	1
34370	1.01543	401	34717	1.01524	6		33791	1.01565	300	34248	1.01543	2
34390	1.01658	300	34737	1.01637	1		33811	1.01682	200	34268	1.01658	3
34410	1.01773	401	34757	1.01751	1		33831	1.01798	401	34288	1.01773	0
34430	1.01887	200	34777	1.01865	2		33851	1.01915	200	34308	1.01889	0
34450	1.02002	300	34797	1.01978	0		33871	1.02032	200	34328	1.02004	2
34470	1.02117	0	34817	1.02092	1		33891	1.02148	200	34348	1.02119	0
34490	1.02232	300	34837	1.02206	0		33911	1.02265	100	34368	1.02234	0
34510	1.02347	0	34857	1.0232	0		33931	1.02382	100	34388	1.0235	0
34530	1.02462	100	34877	1.02433	0		33951	1.02499	0	34408	1.02465	0
34550	1.02577	100	34897	1.02547	1		33971	1.02616	0	34428	1.02581	0
34570	1.02692	100	34917	1.02662	2		33991	1.02734	100	34448	1.02696	0
34590	1.02808	100	34937	1.02776	1		34011	1.02851	0	34468	1.02812	1
34610	1.02923	0	34957	1.0289	0		34031	1.02968	0	34488	1.02928	0
34630	1.03038	200	34977	1.03004	1		34051	1.03085	100	34508	1.03043	0
34650	1.03154	200	34997	1.03118	0		34071	1.03203	0	34528	1.03159	0
34670	1.03269	0	35017	1.03233	0		34091	1.0332	100	34548	1.03275	0
34690	1.03385	0	35037	1.03347	0		34111	1.03438	0	34568	1.03391	0
34710	1.035	0	35057	1.03462	0		34131	1.03555	0	34588	1.03507	0
34730	1.03616	0	35077	1.03576	0		34151	1.03673	0	34608	1.03623	0
34750	1.03732	0	35097	1.03691	0		34171	1.03791	0	34628	1.03739	0
34770	1.03848	0	35117	1.03806	0		34191	1.03909	0	34648	1.03856	0
34790	1.03964	100	35137	1.0392	0		34211	1.04026	0	34668	1.03972	0
34810	1.0408	0	35157	1.04035	0		34231	1.04144	100	34688	1.04088	0
34830	1.04196	0	35177	1.0415	0		34251	1.04262	100	34708	1.04205	0
34850	1.04312	0	35197	1.04265	0		34271	1.0438	0	34728	1.04321	0
34870	1.04428	0	35217	1.0438	0		34291	1.04499	0	34748	1.04438	0
34890	1.04544	0	35237	1.04495	1		34311	1.04617	0	34768	1.04554	0
34910	1.04661	0	35257	1.0461	0		34331	1.04735	2	34788	1.04671	0
34930	1.04777	20	35277	1.04726	0		34351	1.04853	14	34808	1.04788	0
34950	1.04893	19	35297	1.04841	0		34371	1.04972	19	34828	1.04905	0
34970	1.0501	16	35317	1.04956	0		34391	1.0509	12	34848	1.05021	0
34990	1.05126	25	35337	1.05072	2		34411	1.05209	12	34868	1.05138	0
35010	1.05243	19	35357	1.05187	0		34431	1.05327	14	34888	1.05255	0
35030	1.0536	13	35377	1.05302	0		34451	1.05446	14	34908	1.05373	0
35050	1.05476	19	35397	1.05418	1		34471	1.05565	10	34928	1.0549	0
35070	1.05593	27	35417	1.05534	0		34491	1.05684	14	34948	1.05607	0
35090	1.0571	26	35437	1.05649	0		34511	1.05802	11	34968	1.05724	0
35110	1.05827	19	35457	1.05765	1		34531	1.05921	15	34988	1.05841	0
35130	1.05944	28	35477	1.05881	0		34551	1.0604	24	35008	1.05959	0
35150	1.06061	23	35497	1.05997	0		34571	1.06159	19	35028	1.06076	0
35170	1.06178	23	35517	1.06113	0		34591	1.06279	17	35048	1.06194	0
35190	1.06295	19	35537	1.06229	0		34611	1.06398	24	35068	1.06311	0
35210	1.06413	18	35557	1.06345	0		34631	1.06517	10	35088	1.06429	0
35230	1.0653	21	35577	1.06461	0		34651	1.06636	14	35108	1.06547	0
35250	1.06647	26	35597	1.06577	0		34671	1.06756	12	35128	1.06665	0
35270	1.06765	19	35617	1.06694	0		34691	1.06875	17	35148	1.06782	0
35290	1.06882	23	35637	1.0681	0		34711	1.06995	12	35168	1.069	0
35310	1.07	18	35657	1.06926	0		34731	1.07114	12	35188	1.07018	0
35330	1.07118	14	35677	1.07043	0		34751	1.07234	19	35208	1.07136	0
35350	1.07235	25	35697	1.07159	0		34771	1.07354	19	35228	1.07255	0
35370	1.07353	16	35717	1.07276	0		34791	1.07474	20	35248	1.07373	0
35390	1.07471	15	35737	1.07393	0		34811	1.07594	17	35268	1.07491	0
35410	1.07589	12	35757	1.07509	0		34831	1.07713	16	35288	1.07609	0
35430	1.07707	18	35777	1.07626	0		34851	1.07833	19	35308	1.07728	0
35450	1.07825	18	35797	1.07743	0		34871	1.07953	22	35328	1.07846	0
35470	1.07943	18	35817	1.0786	0		34891	1.08074	8	35348	1.07964	0
35490	1.08061	19	35837	1.07977	0		34911	1.08194	16	35368	1.08083	0
35510	1.08179	17	35857	1.08094	0		34931	1.08314	15	35388	1.08202	0
35530	1.08298	16	35877	1.08211	0		34951	1.08434	17	35408	1.0832	0
35550	1.08416	11	35897	1.08328	0		34971	1.08555	12	35428	1.08439	0
35570	1.08535	24	35917	1.08445	0		34991	1.08675	13	35448	1.08558	0
35590	1.08653	17	35937	1.08563	0		35011	1.08796	22	35468	1.08677	0
35610	1.08772	11	35957	1.0868	0		35031	1.08916	13	35488	1.08796	0
35630	1.0889	22	35977	1.08797	0		35051	1.09037	18	35508	1.08915	0
35650	1.09009	13	35997	1.08915	0		35071	1.09158	11	35528	1.09034	0
35670	1.09128	20	36017	1.09032	1		35091	1.09279	13	35548	1.09153	0
35690	1.09246	11	36037	1.0915	0		35111	1.094	10	35568	1.09272	0
35710	1.09365	10	36057	1.09268	0		35131	1.0952	11	35588	1.09392	0
35730	1.09484	10	36077	1.09386	0		35151	1.09641	20	35608	1.09511	0
35750	1.09603	12	36097	1.09503	0		35171	1.09763	9	35628	1.09631	0
35770	1.09722	15	36117	1.09621	0		35191	1.09884	12	35648	1.0975	0
35790	1.09841	14	36137	1.09739	0		35211	1.10005	12	35668	1.09869	0
35810	1.09961	7	36157	1.09857	0		35231	1.10126	11	35688	1.09989	0
35830	1.1008	16	36177	1.09975	0		35251	1.10248	7	35708	1.10109	0
35850	1.10199	15	36197	1.10093	0		35271	1.10369	10	35728	1.10228	0
35870	1.10319	12	36217	1.10211	0		35291	1.10491	12	35748	1.10348	0
35890	1.10438	7	36237	1.1033	0		35311	1.10612	12	35768	1.10468	0
35910	1.10558	14	36257	1.10448	0		35331	1.10734	7	35788	1.10588	0
35930	1.10677	15	36277	1.10566	0		35351	1.10855	13	35808	1.10708	0
35950	1.10797	4	36297	1.10685	0		35371	1.10977	15	35828	1.10828	0
35970	1.10917	12	36317	1.10803	0		35391	1.11099	13	35848	1.10948	0
35990	1.11036	16	36337	1.10922	0		35411	1.11221	9	35868	1.11068	0
36010	1.11156	10	36357	1.11041	0		35431	1.11343	13	35888	1.11189	0
36030	1.11276	7	36377	1.11159	0		35451	1.11465	11	35908	1.11309	0
36050	1.11396	7	36397	1.11278	0		35471	1.11587	8	35928	1.1143	0
36070	1.11516	10	36417	1.11397	0		35491	1.11709	10	35948	1.1155	0
36090	1.11636	10	36437	1.11516	0		35511	1.11831	15	35968	1.11671	0
36110	1.11756	5	36457	1.11634	0		35531	1.11953	11	35988	1.11791	0
36130	1.11877	11	36477	1.11754	0		35551	1.12076	13	36008	1.11912	0
36150	1.11997	7	36497	1.11873	0		35571	1.12198	19	36028	1.12033	0
36170	1.12117	11	36517	1.11992	0		35591	1.12321	14	36048	1.12153	0
36190	1.12238	14	36537	1.12111	0		35611	1.12443	11	36068	1.12274	0
36210	1.12358	10	36557	1.1223	0		35631	1.12566	9	36088	1.12395	0
36230	1.12479	17	36577	1.12349	0		35651	1.12688	7	36108	1.12516	0
36250	1.126	11	36597	1.12469	0		35671	1.12811	18	36128	1.12637	0
36270	1.1272	8	36617	1.12588	0		35691	1.12934	7	36148	1.12758	0
36290	1.12841	13	36637	1.12708	0		35711	1.13057	13	36168	1.12879	0
36310	1.12962	11	36657	1.12827	0		35731	1.1318	4	36188	1.13	0
36330	1.13083	13	36677	1.12947	0		35751	1.13303	12	36208	1.13122	0
36350	1.13204	7	36697	1.13067	0		35771	1.13426	9	36228	1.13243	0
36370	1.13325	10	36717	1.13186	0		35791	1.13549	8	36248	1.13365	0
36390	1.13446	9	36737	1.13306	0		35811	1.13672	11	36268	1.13486	0
36410	1.13567	6	36757	1.13426	0		35831	1.13796	3	36288	1.13608	0
36430	1.13688	8	36777	1.13546	0		35851	1.13919	13	36308	1.13729	0
36450	1.13809	15	36797	1.13666	0		35871	1.14042	9	36328	1.13851	0
36470	1.13931	3	36817	1.13786	0		35891	1.14166	6	36348	1.13973	0
36490	1.14052	7	36837	1.13906	0		35911	1.14289	6	36368	1.14095	0
36510	1.14173	8	36857	1.14027	0		35931	1.14413	13	36388	1.14217	0
36530	1.14295	13	36877	1.14147	0		35951	1.14537	6	36408	1.14339	0
36550	1.14417	6	36897	1.14267	0		35971	1.1466	6	36428	1.14461	0
36570	1.14538	5	36917	1.14388	0		35991	1.14784	8	36448	1.14583	0
36590	1.1466	8	36937	1.14508	0		36011	1.14908	6	36468	1.14705	0
36610	1.14782	4	36957	1.14629	0		36031	1.15032	10	36488	1.14827	0
36630	1.14904	11	36977	1.14749	0		36051	1.15156	4	36508	1.14949	0
36650	1.15026	7	36997	1.1487	0		36071	1.1528	5	36528	1.15072	0
36670	1.15148	1	37017	1.14991	0		36091	1.15404	4	36548	1.15194	0
36690	1.1527	3	37037	1.15111	0		36111	1.15528	10	36568	1.15316	0
36710	1.15392	5	37057	1.15232	0		36131	1.15653	7	36588	1.15439	0
36730	1.15514	4	37077	1.15353	0		36151	1.15777	3	36608	1.15562	0
36750	1.15636	8	37097	1.15474	0		36171	1.15901	4	36628	1.15684	0
36770	1.15759	9	37117	1.15595	0		36191	1.16026	5	36648	1.15807	0
36790	1.15881	7	37137	1.15716	0		36211	1.16151	10	36668	1.1593	0
36810	1.16003	4	37157	1.15837	0		36231	1.16275	8	36688	1.16053	0
36830	1.16126	4	37177	1.15959	0		36251	1.164	4	36708	1.16176	0
36850	1.16248	5	37197	1.1608	0		36271	1.16525	5	36728	1.16299	0
36870	1.16371	4	37217	1.16201	0		36291	1.16649	3	36748	1.16422	0
36890	1.16494	6	37237	1.16323	0		36311	1.16774	11	36768	1.16545	0
36910	1.16616	7	37257	1.16444	0		36331	1.16899	4	36788	1.16668	0
36930	1.16739	8	37277	1.16566	0		36351	1.17024	7	36808	1.16791	0
36950	1.16862	4	37297	1.16687	0		36371	1.17149	3	36828	1.16915	0
36970	1.16985	9	37317	1.16809	0		36391	1.17274	9	36848	1.17038	0
36990	1.17108	1	37337	1.16931	0		36411	1.174	4	36868	1.17161	0
37010	1.17231	3	37357	1.17053	0		36431	1.17525	5	36888	1.17285	0
37030	1.17354	3	37377	1.17174	0		36451	1.1765	3	36908	1.17409	0
37050	1.17478	7	37397	1.17296	0		36471	1.17776	4	36928	1.17532	0
37070	1.17601	5	37417	1.17418	0		36491	1.17901	5	36948	1.17656	0
37090	1.17724	4	37437	1.1754	0		36511	1.18027	2	36968	1.1778	0
37110	1.17848	6	37457	1.17662	0		36531	1.18152	2	36988	1.17904	0
37130	1.17971	5	37477	1.17785	0		36551	1.18278	8	37008	1.18027	0
37150	1.18095	4	37497	1.17907	0		36571	1.18404	3	37028	1.18151	0
37170	1.18218	4	37517	1.18029	0		36591	1.1853	3	37048	1.18275	0
37190	1.18342	5	37537	1.18152	0		36611	1.18656	4	37068	1.18399	0
37210	1.18466	7	37557	1.18274	0		36631	1.18782	5	37088	1.18524	0
37230	1.18589	7	37577	1.18396	0		36651	1.18908	5	37108	1.18648	0
37250	1.18713	1	37597	1.18519	0		36671	1.19034	3	37128	1.18772	0
37270	1.18837	2	37617	1.18642	0		36691	1.1916	3	37148	1.18897	0
37290	1.18961	3	37637	1.18764	0		36711	1.19286	1	37168	1.19021	0
37310	1.19085	3	37657	1.18887	0		36731	1.19412	3	37188	1.19145	0
37330	1.19209	3	37677	1.1901	0		36751	1.19539	0	37208	1.1927	0
37350	1.19334	7	37697	1.19133	0		36771	1.19665	2	37228	1.19395	0
37370	1.19458	1	37717	1.19256	0		36791	1.19792	2	37248	1.19519	0
37390	1.19582	2	37737	1.19379	0		36811	1.19918	2	37268	1.19644	0
37410	1.19706	4	37757	1.19502	0		36831	1.20045	1	37288	1.19769	0
37430	1.19831	1	37777	1.19625	0		36851	1.20171	5	37308	1.19894	0
37450	1.19955	2	37797	1.19748	0		36871	1.20298	5	37328	1.20019	0
37470	1.2008	1	37817	1.19871	0		36891	1.20425	3	37348	1.20144	0
37490	1.20205	1	37837	1.19995	0		36911	1.20552	2	37368	1.20269	0
37510	1.20329	2	37857	1.20118	0		36931	1.20679	4	37388	1.20394	0
37530	1.20454	6	37877	1.20241	0		36951	1.20806	2	37408	1.20519	0
37550	1.20579	1	37897	1.20365	0		36971	1.20933	3	37428	1.20644	0
37570	1.20704	2	37917	1.20488	1		36991	1.2106	6	37448	1.2077	0
37590	1.20829	2	37937	1.20612	0		37011	1.21187	3	37468	1.20895	0
37610	1.20954	1	37957	1.20736	0		37031	1.21315	1	37488	1.21021	0
37630	1.21079	1	37977	1.2086	0		37051	1.21442	1	37508	1.21146	0
37650	1.21204	1	37997	1.20983	0		37071	1.21569	2	37528	1.21272	0
37670	1.21329	1	38017	1.21107	0		37091	1.21697	4	37548	1.21397	0
37690	1.21454	1	38037	1.21231	0		37111	1.21824	5	37568	1.21523	0
37710	1.2158	5	38057	1.21355	0		37131	1.21952	1	37588	1.21649	0
37730	1.21705	0	38077	1.21479	0		37151	1.2208	4	37608	1.21775	0
37750	1.21831	6	38097	1.21603	0		37171	1.22208	1	37628	1.21901	0
37770	1.21956	1	38117	1.21728	1		37191	1.22335	1	37648	1.22027	0
37790	1.22082	3	38137	1.21852	0		37211	1.22463	2	37668	1.22153	0
37810	1.22208	0	38157	1.21976	0		37231	1.22591	2	37688	1.22279	0
37830	1.22333	2	38177	1.22101	0		37251	1.22719	0	37708	1.22405	0
37850	1.22459	3	38197	1.22225	0		37271	1.22847	4	37728	1.22531	0
37870	1.22585	4	38217	1.2235	0		37291	1.22975	4	37748	1.22658	0
37890	1.22711	4	38237	1.22474	0		37311	1.23104	2	37768	1.22784	0
37910	1.22837	2	38257	1.22599	0		37331	1.23232	1	37788	1.2291	0
37930	1.22963	3	38277	1.22724	0		37351	1.2336	3	37808	1.23037	0
37950	1.23089	4	38297	1.22848	0		37371	1.23489	3	37828	1.23164	0
37970	1.23215	2	38317	1.22973	0		37391	1.23617	2	37848	1.2329	0
37990	1.23341	0	38337	1.23098	0		37411	1.23746	2	37868	1.23417	0
38010	1.23468	4	38357	1.23223	0		37431	1.23874	1	37888	1.23544	0
38030	1.23594	0	38377	1.23348	0		37451	1.24003	2	37908	1.2367	0
38050	1.23721	1	38397	1.23473	0		37471	1.24132	1	37928	1.23797	0
38070	1.23847	2	38417	1.23598	0		37491	1.24261	0	37948	1.23924	0
38090	1.23974	2	38437	1.23724	0		37511	1.2439	4	37968	1.24051	0
38110	1.241	4	38457	1.23849	0		37531	1.24518	1	37988	1.24178	0
38130	1.24227	2	38477	1.23974	0		37551	1.24647	4	38008	1.24306	0
38150	1.24354	1	38497	1.241	0		37571	1.24777	2	38028	1.24433	0
38170	1.24481	2	38517	1.24225	0		37591	1.24906	1	38048	1.2456	0
38190	1.24608	0	38537	1.24351	0		37611	1.25035	1	38068	1.24687	0
38210	1.24734	2	38557	1.24476	0		37631	1.25164	1	38088	1.24815	0
38230	1.24862	1	38577	1.24602	0		37651	1.25294	2	38108	1.24942	0
38250	1.24989	3	38597	1.24728	0		37671	1.25423	2	38128	1.2507	0
38270	1.25116	1	38617	1.24853	0		37691	1.25553	1	38148	1.25198	0
38290	1.25243	2	38637	1.24979	0		37711	1.25682	1	38168	1.25325	0
38310	1.2537	0	38657	1.25105	0		37731	1.25812	2	38188	1.25453	0
38330	1.25498	1	38677	1.25231	0		37751	1.25941	3	38208	1.25581	0
38350	1.25625	3	38697	1.25357	0		37771	1.26071	0	38228	1.25709	0
38370	1.25753	3	38717	1.25483	0		37791	1.26201	4	38248	1.25837	0
38390	1.2588	0	38737	1.25609	0		37811	1.26331	4	38268	1.25965	0
38410	1.26008	0	38757	1.25736	0		37831	1.26461	1	38288	1.26093	0
38430	1.26135	1	38777	1.25862	0		37851	1.26591	4	38308	1.26221	0
38450	1.26263	1	38797	1.25988	0		37871	1.26721	1	38328	1.26349	0
38470	1.26391	1	38817	1.26115	0		37891	1.26851	4	38348	1.26477	0
38490	1.26519	1	38837	1.26241	0		37911	1.26981	1	38368	1.26606	0
38510	1.26647	0	38857	1.26368	0		37931	1.27112	2	38388	1.26734	0
38530	1.26775	0	38877	1.26494	0		37951	1.27242	0	38408	1.26862	0
38550	1.26903	1	38897	1.26621	0		37971	1.27372	0	38428	1.26991	0
38570	1.27031	1	38917	1.26748	0		37991	1.27503	4	38448	1.2712	0
38590	1.27159	2	38937	1.26875	0		38011	1.27634	3	38468	1.27248	1
38610	1.27287	1	38957	1.27001	0		38031	1.27764	1	38488	1.27377	0
38630	1.27416	3	38977	1.27128	0		38051	1.27895	2	38508	1.27506	0
38650	1.27544	1	38997	1.27255	0		38071	1.28026	1	38528	1.27635	0
38670	1.27672	0	39017	1.27382	0		38091	1.28157	1	38548	1.27764	0
38690	1.27801	0	39037	1.2751	0		38111	1.28287	1	38568	1.27893	0
38710	1.2793	0	39057	1.27637	0		38131	1.28418	1	38588	1.28022	0
38730	1.28058	1	39077	1.27764	0		38151	1.28549	0	38608	1.28151	0
38750	1.28187	0	39097	1.27891	0		38171	1.2868	0	38628	1.2828	0
38770	1.28316	0	39117	1.28019	0		38191	1.28812	0	38648	1.28409	0
38790	1.28445	0	39137	1.28146	0		38211	1.28943	1	38668	1.28538	0
38810	1.28573	2	39157	1.28274	0		38231	1.29074	0	38688	1.28668	0
38830	1.28702	1	39177	1.28401	0		38251	1.29205	1	38708	1.28797	0
38850	1.28831	1	39197	1.28529	0		38271	1.29337	0	38728	1.28927	0
38870	1.2896	2	39217	1.28656	0		38291	1.29468	0	38748	1.29056	0
38890	1.2909	0	39237	1.28784	0		38311	1.296	0	38768	1.29186	0
38910	1.29219	1	39257	1.28912	0		38331	1.29732	0	38788	1.29316	0
38930	1.29348	1	39277	1.2904	0		38351	1.29863	0	38808	1.29445	0
38950	1.29478	1	39297	1.29168	0		38371	1.29995	0	38828	1.29575	0
38970	1.29607	1	39317	1.29296	0		38391	1.30127	1	38848	1.29705	0
38990	1.29736	2	39337	1.29424	0		38411	1.30259	2	38868	1.29835	0
39010	1.29866	0	39357	1.29552	0		38431	1.30391	0	38888	1.29965	0
39030	1.29995	1	39377	1.2968	0		38451	1.30523	0	38908	1.30095	0
39050	1.30125	0	39397	1.29808	0		38471	1.30655	0	38928	1.30225	1
39070	1.30255	3	39417	1.29937	1		38491	1.30787	2	38948	1.30356	0
39090	1.30385	1	39437	1.30065	0		38511	1.30919	1	38968	1.30486	0
39110	1.30515	1	39457	1.30194	0		38531	1.31052	0	38988	1.30616	0
39130	1.30645	0	39477	1.30322	0		38551	1.31184	0	39008	1.30747	0
39150	1.30775	1	39497	1.30451	0		38571	1.31316	0	39028	1.30877	0
39170	1.30905	0	39517	1.30579	0		38591	1.31449	0	39048	1.31008	0
39190	1.31035	0	39537	1.30708	0		38611	1.31581	3	39068	1.31138	0
39210	1.31165	0	39557	1.30837	0		38631	1.31714	1	39088	1.31269	0
39230	1.31295	0	39577	1.30966	0		38651	1.31847	0	39108	1.314	0
39250	1.31425	0	39597	1.31095	0		38671	1.3198	1	39128	1.3153	0
39270	1.31556	2	39617	1.31224	0		38691	1.32112	1	39148	1.31661	0
39290	1.31686	0	39637	1.31353	0		38711	1.32245	1	39168	1.31792	0
39310	1.31817	0	39657	1.31482	0		38731	1.32378	0	39188	1.31923	0
39330	1.31947	2	39677	1.31611	0		38751	1.32511	0	39208	1.32054	0
39350	1.32078	2	39697	1.3174	0		38771	1.32644	0	39228	1.32186	0
39370	1.32209	1	39717	1.31869	0		38791	1.32778	1	39248	1.32317	1
39390	1.3234	2	39737	1.31999	0		38811	1.32911	0	39268	1.32448	0
39410	1.3247	0	39757	1.32128	0		38831	1.33044	0	39288	1.32579	0
39430	1.32601	0	39777	1.32258	0		38851	1.33177	1	39308	1.32711	0
39450	1.32732	0	39797	1.32387	0		38871	1.33311	1	39328	1.32842	0
39470	1.32863	0	39817	1.32517	0		38891	1.33444	1	39348	1.32974	0
39490	1.32994	0	39837	1.32646	0		38911	1.33578	0	39368	1.33105	0
39510	1.33126	0	39857	1.32776	0		38931	1.33712	0	39388	1.33237	0
39530	1.33257	1	39877	1.32906	0		38951	1.33845	1	39408	1.33369	0
39550	1.33388	1	39897	1.33036	0		38971	1.33979	0	39428	1.335	0
39570	1.33519	0	39917	1.33166	0		38991	1.34113	0	39448	1.33632	0
39590	1.33651	0	39937	1.33295	0		39011	1.34247	0	39468	1.33764	0
39610	1.33782	0	39957	1.33426	0		39031	1.34381	3	39488	1.33896	0
39630	1.33914	0	39977	1.33556	0		39051	1.34515	0	39508	1.34028	0
39650	1.34046	0	39997	1.33686	0		39071	1.34649	0	39528	1.3416	0
39670	1.34177	0	40017	1.33816	0		39091	1.34783	1	39548	1.34292	0
39690	1.34309	1	40037	1.33946	0		39111	1.34917	1	39568	1.34425	0
39710	1.34441	0	40057	1.34077	0		39131	1.35052	0	39588	1.34557	0
39730	1.34573	1	40077	1.34207	0		39151	1.35186	0	39608	1.34689	0
39750	1.34705	0	40097	1.34338	0		39171	1.3532	0	39628	1.34822	0
39770	1.34837	0	40117	1.34468	0		39191	1.35455	0	39648	1.34954	0
39790	1.34969	1	40137	1.34599	0		39211	1.3559	0	39668	1.35087	0
39810	1.35101	0	40157	1.34729	0		39231	1.35724	0	39688	1.3522	0
39830	1.35233	0	40177	1.3486	0		39251	1.35859	0	39708	1.35352	0
39850	1.35365	1	40197	1.34991	0		39271	1.35994	2	39728	1.35485	0
39870	1.35498	1	40217	1.35122	0		39291	1.36129	0	39748	1.35618	0
39890	1.3563	1	40237	1.35253	0		39311	1.36263	0	39768	1.35751	0
39910	1.35762	0	40257	1.35384	0		39331	1.36398	0	39788	1.35884	0
39930	1.35895	0	40277	1.35515	0		39351	1.36533	0	39808	1.36017	0
39950	1.36028	0	40297	1.35646	0		39371	1.36668	0	39828	1.3615	0
39970	1.3616	0	40317	1.35777	0		39391	1.36804	0	39848	1.36283	0
39990	1.36293	1	40337	1.35908	0		39411	1.36939	1	39868	1.36416	0
40010	1.36426	0	40357	1.3604	0		39431	1.37074	0	39888	1.36549	0
40030	1.36559	0	40377	1.36171	0		39451	1.3721	0	39908	1.36683	0
40050	1.36692	0	40397	1.36302	0		39471	1.37345	0	39928	1.36816	0
40070	1.36824	0	40417	1.36434	0		39491	1.37481	1	39948	1.36949	0
40090	1.36957	1	40437	1.36565	0		39511	1.37616	0	39968	1.37083	0
40110	1.37091	0	40457	1.36697	0		39531	1.37752	0	39988	1.37217	0
40130	1.37224	0	40477	1.36829	0		39551	1.37888	0	40008	1.3735	0
40150	1.37357	0	40497	1.3696	0		39571	1.38023	0	40028	1.37484	0
40170	1.3749	0	40517	1.37092	0		39591	1.38159	1	40048	1.37618	0
40190	1.37624	0	40537	1.37224	0		39611	1.38295	0	40068	1.37752	0
40210	1.37757	0	40557	1.37356	0		39631	1.38431	0	40088	1.37886	0
40230	1.37891	0	40577	1.37488	0		39651	1.38567	1	40108	1.3802	0
40250	1.38024	0	40597	1.3762	0		39671	1.38703	1	40128	1.38154	0
40270	1.38158	1	40617	1.37752	0		39691	1.38839	0	40148	1.38288	0
40290	1.38291	0	40637	1.37885	0		39711	1.38976	0	40168	1.38422	0
40310	1.38425	0	40657	1.38017	0		39731	1.39112	0	40188	1.38556	0
40330	1.38559	1	40677	1.38149	0		39751	1.39248	0	40208	1.38691	0
40350	1.38693	2	40697	1.38281	0		39771	1.39385	0	40228	1.38825	0
40370	1.38827	1	40717	1.38414	0		39791	1.39521	0	40248	1.38959	0
40390	1.38961	1	40737	1.38546	0		39811	1.39658	1	40268	1.39094	0
40410	1.39095	3	40757	1.38679	0		39831	1.39794	1	40288	1.39228	0
40430	1.39229	2	40777	1.38812	0		39851	1.39931	2	40308	1.39363	0
40450	1.39363	1	40797	1.38944	0		39871	1.40068	2	40328	1.39498	0
40470	1.39498	2	40817	1.39077	1		39891	1.40205	0	40348	1.39633	0
40490	1.39632	2	40837	1.3921	0		39911	1.40342	1	40368	1.39768	0
40510	1.39766	4	40857	1.39343	0		39931	1.40479	0	40388	1.39902	0
40530	1.39901	3	40877	1.39476	0		39951	1.40616	0	40408	1.40037	0
40550	1.40035	1	40897	1.39609	0		39971	1.40753	1	40428	1.40172	0
40570	1.4017	2	40917	1.39742	0		39991	1.4089	1	40448	1.40308	0
40590	1.40304	5	40937	1.39875	0		40011	1.41027	3	40468	1.40443	0
40610	1.40439	0	40957	1.40008	0		40031	1.41165	1	40488	1.40578	0
40630	1.40574	0	40977	1.40141	0		40051	1.41302	0	40508	1.40713	0
40650	1.40709	0	40997	1.40275	0		40071	1.41439	1	40528	1.40848	1
40670	1.40844	0	41017	1.40408	0		40091	1.41577	0	40548	1.40984	0
40690	1.40979	1	41037	1.40542	0		40111	1.41714	0	40568	1.41119	0
40710	1.41114	0	41057	1.40675	0		40131	1.41852	0	40588	1.41255	0
40730	1.41249	1	41077	1.40809	0		40151	1.4199	0	40608	1.41391	0
40750	1.41384	0	41097	1.40942	0		40171	1.42128	0	40628	1.41526	0
40770	1.41519	1	41117	1.41076	0		40191	1.42265	0	40648	1.41662	0
40790	1.41654	0	41137	1.4121	0		40211	1.42403	0	40668	1.41798	0
40810	1.4179	0	41157	1.41344	0		40231	1.42541	0	40688	1.41934	0
40830	1.41925	0	41177	1.41478	0		40251	1.42679	0	40708	1.4207	0
40850	1.42061	0	41197	1.41612	0		40271	1.42817	0	40728	1.42206	0
40870	1.42196	1	41217	1.41746	0		40291	1.42956	1	40748	1.42342	0
40890	1.42332	0	41237	1.4188	0		40311	1.43094	0	40768	1.42478	0
40910	1.42468	0	41257	1.42014	0		40331	1.43232	0	40788	1.42614	0
40930	1.42603	0	41277	1.42148	0		40351	1.43371	0	40808	1.4275	0
40950	1.42739	0	41297	1.42282	0		40371	1.43509	0	40828	1.42887	0
40970	1.42875	0	41317	1.42417	0		40391	1.43647	0	40848	1.43023	0
40990	1.43011	0	41337	1.42551	0		40411	1.43786	1	40868	1.4316	0
41010	1.43147	0	41357	1.42686	0		40431	1.43925	1	40888	1.43296	0
41030	1.43283	0	41377	1.4282	0		40451	1.44063	0	40908	1.43433	0
41050	1.43419	0	41397	1.42955	0		40471	1.44202	0	40928	1.43569	0
41070	1.43555	0	41417	1.43089	0		40491	1.44341	1	40948	1.43706	0
41090	1.43692	1	41437	1.43224	0		40511	1.4448	1	40968	1.43843	0
41110	1.43828	1	41457	1.43359	0		40531	1.44619	0	40988	1.4398	0
41130	1.43965	0	41477	1.43494	0		40551	1.44758	0	41008	1.44117	0
41150	1.44101	0	41497	1.43629	0		40571	1.44897	1	41028	1.44254	0
41170	1.44237	1	41517	1.43764	0		40591	1.45036	0	41048	1.44391	0
41190	1.44374	1	41537	1.43899	0		40611	1.45175	1	41068	1.44528	0
41210	1.44511	0	41557	1.44034	0		40631	1.45315	1	41088	1.44665	0
41230	1.44647	0	41577	1.44169	0		40651	1.45454	1	41108	1.44802	0
41250	1.44784	1	41597	1.44304	0		40671	1.45594	0	41128	1.4494	0
41270	1.44921	1	41617	1.4444	0		40691	1.45733	1	41148	1.45077	0
41290	1.45058	2	41637	1.44575	0		40711	1.45873	1	41168	1.45214	0
41310	1.45195	0	41657	1.4471	0		40731	1.46012	1	41188	1.45352	0
41330	1.45332	0	41677	1.44846	0		40751	1.46152	0	41208	1.4549	0
41350	1.45469	0	41697	1.44981	0		40771	1.46292	1	41228	1.45627	0
41370	1.45606	0	41717	1.45117	0		40791	1.46432	1	41248	1.45765	0
41390	1.45744	1	41737	1.45253	0		40811	1.46572	1	41268	1.45903	0
41410	1.45881	1	41757	1.45388	0		40831	1.46712	0	41288	1.4604	0
41430	1.46018	1	41777	1.45524	0		40851	1.46852	0	41308	1.46178	0
41450	1.46156	0	41797	1.4566	0		40871	1.46992	0	41328	1.46316	0
41470	1.46293	1	41817	1.45796	0		40891	1.47132	0	41348	1.46454	0
41490	1.46431	1	41837	1.45932	1		40911	1.47272	0	41368	1.46592	0
41510	1.46568	0	41857	1.46068	0		40931	1.47413	1	41388	1.46731	0
41530	1.46706	0	41877	1.46204	0		40951	1.47553	0	41408	1.46869	0
41550	1.46844	2	41897	1.4634	0		40971	1.47693	1	41428	1.47007	0
41570	1.46982	0	41917	1.46477	0		40991	1.47834	0	41448	1.47145	0
41590	1.4712	0	41937	1.46613	0		41011	1.47975	1	41468	1.47284	0
41610	1.47257	0	41957	1.46749	0		41031	1.48115	0	41488	1.47422	0
41630	1.47395	0	41977	1.46886	0		41051	1.48256	0	41508	1.47561	0
41650	1.47534	0	41997	1.47022	0		41071	1.48397	0	41528	1.477	0
41670	1.47672	0	42017	1.47159	0		41091	1.48537	0	41548	1.47838	0
41690	1.4781	0	42037	1.47295	0		41111	1.48679	1	41568	1.47977	0
41710	1.47948	0	42057	1.47432	1		41131	1.48819	0	41588	1.48116	0
41730	1.48087	0	42077	1.47569	0		41151	1.48961	0	41608	1.48255	0
41750	1.48225	0	42097	1.47706	0		41171	1.49102	0	41628	1.48394	0
41770	1.48363	1	42117	1.47843	0		41191	1.49243	0	41648	1.48533	0
41790	1.48502	1	42137	1.47979	0		41211	1.49384	0	41668	1.48672	0
41810	1.48641	1	42157	1.48117	0		41231	1.49525	0	41688	1.48811	0
41830	1.48779	1	42177	1.48254	0		41251	1.49667	2	41708	1.4895	0
41850	1.48918	0	42197	1.48391	0		41271	1.49808	0	41728	1.49089	0
41870	1.49057	0	42217	1.48528	0		41291	1.4995	0	41748	1.49229	0
41890	1.49196	0	42237	1.48665	0		41311	1.50091	0	41768	1.49368	0
41910	1.49334	1	42257	1.48802	0		41331	1.50233	1	41788	1.49507	0
41930	1.49473	0	42277	1.4894	0		41351	1.50375	0	41808	1.49647	0
41950	1.49613	0	42297	1.49077	0		41371	1.50517	1	41828	1.49787	0
41970	1.49752	0	42317	1.49215	0		41391	1.50658	1	41848	1.49926	0
41990	1.49891	1	42337	1.49352	0		41411	1.508	0	41868	1.50066	0
42010	1.5003	1	42357	1.4949	0		41431	1.50942	1	41888	1.50206	0
42030	1.50169	0	42377	1.49628	0		41451	1.51084	0	41908	1.50345	0
42050	1.50309	1	42397	1.49766	0		41471	1.51226	1	41928	1.50485	0
42070	1.50448	0	42417	1.49903	0		41491	1.51369	0	41948	1.50625	0
42090	1.50588	0	42437	1.50041	0		41511	1.51511	0	41968	1.50765	0
42110	1.50727	0	42457	1.50179	0		41531	1.51653	0	41988	1.50906	0
42130	1.50867	0	42477	1.50317	0		41551	1.51796	1	42008	1.51046	0
42150	1.51007	1	42497	1.50455	0		41571	1.51938	0	42028	1.51186	0
42170	1.51146	0	42517	1.50594	0		41591	1.5208	0	42048	1.51326	0
42190	1.51286	0	42537	1.50732	0		41611	1.52223	0	42068	1.51467	0
42210	1.51426	0	42557	1.5087	0		41631	1.52366	0	42088	1.51607	0
42230	1.51566	0	42577	1.51008	0		41651	1.52509	0	42108	1.51748	0
42250	1.51706	0	42597	1.51147	0		41671	1.52651	0	42128	1.51888	0
42270	1.51846	0	42617	1.51285	0		41691	1.52794	0	42148	1.52029	0
42290	1.51986	1	42637	1.51424	0		41711	1.52937	2	42168	1.5217	0
42310	1.52127	0	42657	1.51562	0		41731	1.5308	0	42188	1.5231	0
42330	1.52267	0	42677	1.51701	0		41751	1.53223	0	42208	1.52451	0
42350	1.52407	0	42697	1.5184	0		41771	1.53366	0	42228	1.52592	0
42370	1.52548	0	42717	1.51978	0		41791	1.53509	1	42248	1.52733	0
42390	1.52688	0	42737	1.52117	0		41811	1.53653	0	42268	1.52874	0
42410	1.52829	0	42757	1.52256	0		41831	1.53796	0	42288	1.53015	0
42430	1.52969	0	42777	1.52395	0		41851	1.53939	0	42308	1.53156	0
42450	1.5311	0	42797	1.52534	0		41871	1.54083	0	42328	1.53297	0
42470	1.53251	1	42817	1.52673	0		41891	1.54226	0	42348	1.53439	0
42490	1.53391	0	42837	1.52812	0		41911	1.5437	0	42368	1.5358	0
42510	1.53532	0	42857	1.52952	0		41931	1.54514	0	42388	1.53721	0
42530	1.53673	0	42877	1.53091	0		41951	1.54657	0	42408	1.53863	0
42550	1.53814	0	42897	1.5323	0		41971	1.54801	0	42428	1.54004	0
42570	1.53955	0	42917	1.5337	0		41991	1.54945	0	42448	1.54146	0
42590	1.54096	0	42937	1.53509	0		42011	1.55089	0	42468	1.54288	0
42610	1.54238	0	42957	1.53649	0		42031	1.55233	0	42488	1.54429	0
42630	1.54379	0	42977	1.53788	0		42051	1.55377	0	42508	1.54571	0
42650	1.5452	0	42997	1.53928	0		42071	1.55521	0	42528	1.54713	0
42670	1.54661	0	43017	1.54068	0		42091	1.55665	1	42548	1.54855	0
42690	1.54803	0	43037	1.54208	0		42111	1.5581	1	42568	1.54997	0
42710	1.54944	0	43057	1.54347	0		42131	1.55954	0	42588	1.55139	0
42730	1.55086	0	43077	1.54487	0		42151	1.56098	0	42608	1.55281	0
42750	1.55228	0	43097	1.54628	0		42171	1.56243	1	42628	1.55423	0
42770	1.55369	0	43117	1.54767	0		42191	1.56387	0	42648	1.55566	0
42790	1.55511	0	43137	1.54908	0		42211	1.56532	1	42668	1.55708	0
42810	1.55653	0	43157	1.55048	0		42231	1.56676	0	42688	1.5585	0
42830	1.55795	0	43177	1.55188	0		42251	1.56821	0	42708	1.55993	0
42850	1.55937	2	43197	1.55328	0		42271	1.56966	0	42728	1.56135	0
42870	1.56079	0	43217	1.55469	0		42291	1.57111	0	42748	1.56278	0
42890	1.56221	0	43237	1.55609	0		42311	1.57256	0	42768	1.56421	0
42910	1.56363	0	43257	1.5575	1		42331	1.57401	0	42788	1.56563	0
42930	1.56505	0	43277	1.5589	0		42351	1.57546	0	42808	1.56706	0
42950	1.56648	0	43297	1.56031	0		42371	1.57691	0	42828	1.56849	0
42970	1.5679	0	43317	1.56171	0		42391	1.57836	0	42848	1.56992	0
42990	1.56932	0	43337	1.56312	0		42411	1.57981	0	42868	1.57135	0
43010	1.57075	0	43357	1.56453	0		42431	1.58127	2	42888	1.57278	0
43030	1.57217	0	43377	1.56594	0		42451	1.58272	0	42908	1.57421	0
43050	1.5736	1	43397	1.56735	0		42471	1.58418	0	42928	1.57564	0
43070	1.57503	1	43417	1.56876	0		42491	1.58563	0	42948	1.57707	0
43090	1.57645	0	43437	1.57017	0		42511	1.58709	0	42968	1.57851	0
43110	1.57788	1	43457	1.57158	0		42531	1.58854	0	42988	1.57994	0
43130	1.57931	0	43477	1.57299	0		42551	1.59	0	43008	1.58137	0
43150	1.58074	0	43497	1.57441	0		42571	1.59146	0	43028	1.58281	0
43170	1.58217	0	43517	1.57582	0		42591	1.59292	0	43048	1.58424	0
43190	1.5836	1	43537	1.57723	0		42611	1.59438	0	43068	1.58568	0
43210	1.58503	0	43557	1.57865	0		42631	1.59584	0	43088	1.58712	0
43230	1.58646	0	43577	1.58006	0		42651	1.5973	1	43108	1.58856	0
43250	1.5879	0	43597	1.58148	0		42671	1.59876	0	43128	1.58999	0
43270	1.58933	0	43617	1.58289	0		42691	1.60022	0	43148	1.59143	0
43290	1.59076	0	43637	1.58431	0		42711	1.60168	0	43168	1.59287	0
43310	1.5922	0	43657	1.58573	0		42731	1.60315	1	43188	1.59431	0
43330	1.59363	0	43677	1.58715	0		42751	1.60461	0	43208	1.59575	0
43350	1.59507	0	43697	1.58857	0		42771	1.60608	0	43228	1.59719	0
43370	1.5965	1	43717	1.58999	0		42791	1.60754	0	43248	1.59864	0
43390	1.59794	0	43737	1.59141	0		42811	1.60901	0	43268	1.60008	0
43410	1.59938	0	43757	1.59283	0		42831	1.61047	0	43288	1.60152	0
43430	1.60082	0	43777	1.59425	0		42851	1.61194	1	43308	1.60297	0
43450	1.60226	0	43797	1.59567	0		42871	1.61341	0	43328	1.60441	0
43470	1.6037	0	43817	1.59709	0		42891	1.61488	0	43348	1.60586	0
43490	1.60514	0	43837	1.59852	0		42911	1.61635	0	43368	1.6073	0
43510	1.60658	0	43857	1.59994	0		42931	1.61782	0	43388	1.60875	0
43530	1.60802	0	43877	1.60136	0		42951	1.61929	0	43408	1.6102	0
43550	1.60946	0	43897	1.60279	0		42971	1.62076	0	43428	1.61164	0
43570	1.6109	0	43917	1.60422	0		42991	1.62223	0	43448	1.61309	0
43590	1.61235	1	43937	1.60564	0		43011	1.6237	0	43468	1.61454	0
43610	1.61379	0	43957	1.60707	0		43031	1.62518	0	43488	1.61599	0
43630	1.61524	0	43977	1.6085	0		43051	1.62665	0	43508	1.61744	0
43650	1.61668	0	43997	1.60993	0		43071	1.62813	0	43528	1.61889	0
43670	1.61813	0	44017	1.61136	0		43091	1.6296	0	43548	1.62035	0
43690	1.61957	0	44037	1.61278	0		43111	1.63108	0	43568	1.6218	0
43710	1.62102	0	44057	1.61421	0		43131	1.63255	0	43588	1.62325	0
43730	1.62247	0	44077	1.61565	0		43151	1.63403	0	43608	1.62471	0
43750	1.62392	1	44097	1.61708	0		43171	1.63551	0	43628	1.62616	0
43770	1.62537	0	44117	1.61851	0		43191	1.63699	0	43648	1.62762	0
43790	1.62682	0	44137	1.61994	0		43211	1.63847	0	43668	1.62907	0
43810	1.62827	1	44157	1.62138	0		43231	1.63995	0	43688	1.63053	0
43830	1.62972	0	44177	1.62281	0		43251	1.64143	0	43708	1.63199	0
43850	1.63117	0	44197	1.62424	0		43271	1.64291	0	43728	1.63344	0
43870	1.63262	0	44217	1.62568	0		43291	1.64439	0	43748	1.6349	0
43890	1.63408	0	44237	1.62712	0		43311	1.64587	0	43768	1.63636	0
43910	1.63553	0	44257	1.62855	0		43331	1.64736	1	43788	1.63782	0
43930	1.63698	0	44277	1.62999	0		43351	1.64884	0	43808	1.63928	0
43950	1.63844	0	44297	1.63143	0		43371	1.65033	0	43828	1.64074	0
43970	1.6399	1	44317	1.63287	0		43391	1.65181	0	43848	1.6422	0
43990	1.64135	0	44337	1.63431	0		43411	1.6533	0	43868	1.64366	0
44010	1.64281	0	44357	1.63575	0		43431	1.65478	1	43888	1.64513	0
44030	1.64427	0	44377	1.63719	0		43451	1.65627	0	43908	1.64659	0
44050	1.64573	0	44397	1.63863	0		43471	1.65776	0	43928	1.64806	0
44070	1.64718	0	44417	1.64007	0		43491	1.65925	0	43948	1.64952	0
44090	1.64864	0	44437	1.64151	0		43511	1.66074	0	43968	1.65099	0
44110	1.6501	1	44457	1.64295	0		43531	1.66223	0	43988	1.65245	0
44130	1.65157	0	44477	1.6444	0		43551	1.66372	0	44008	1.65392	0
44150	1.65303	0	44497	1.64584	0		43571	1.66521	0	44028	1.65539	0
44170	1.65449	0	44517	1.64729	0		43591	1.6667	0	44048	1.65685	0
44190	1.65595	0	44537	1.64873	0		43611	1.66819	0	44068	1.65832	0
44210	1.65742	0	44557	1.65018	0		43631	1.66969	1	44088	1.65979	0
44230	1.65888	0	44577	1.65163	0		43651	1.67118	0	44108	1.66126	0
44250	1.66034	0	44597	1.65307	0		43671	1.67268	0	44128	1.66273	0
44270	1.66181	0	44617	1.65452	0		43691	1.67417	0	44148	1.6642	0
44290	1.66328	0	44637	1.65597	0		43711	1.67567	0	44168	1.66568	0
44310	1.66474	0	44657	1.65742	0		43731	1.67716	0	44188	1.66715	0
44330	1.66621	0	44677	1.65887	0		43751	1.67866	0	44208	1.66862	0
44350	1.66768	0	44697	1.66032	0		43771	1.68016	1	44228	1.6701	0
44370	1.66915	0	44717	1.66177	0		43791	1.68166	0	44248	1.67157	0
44390	1.67062	0	44737	1.66322	1		43811	1.68316	0	44268	1.67305	0
44410	1.67209	0	44757	1.66467	0		43831	1.68466	0	44288	1.67452	0
44430	1.67356	0	44777	1.66613	0		43851	1.68616	1	44308	1.676	0
44450	1.67503	0	44797	1.66758	0		43871	1.68766	0	44328	1.67748	0
44470	1.6765	0	44817	1.66904	1		43891	1.68916	0	44348	1.67895	0
44490	1.67797	0	44837	1.67049	0		43911	1.69066	0	44368	1.68043	0
44510	1.67945	0	44857	1.67195	0		43931	1.69217	0	44388	1.68191	0
44530	1.68092	0	44877	1.6734	0		43951	1.69367	0	44408	1.68339	0
44550	1.6824	0	44897	1.67486	0		43971	1.69518	0	44428	1.68487	0
44570	1.68387	0	44917	1.67632	0		43991	1.69668	0	44448	1.68635	0
44590	1.68535	0	44937	1.67778	0		44011	1.69819	1	44468	1.68783	0
44610	1.68682	0	44957	1.67924	0		44031	1.69969	1	44488	1.68932	0
44630	1.6883	0	44977	1.6807	0		44051	1.7012	0	44508	1.6908	0
44650	1.68978	0	44997	1.68216	0		44071	1.70271	0	44528	1.69229	0
44670	1.69126	0	45017	1.68362	0		44091	1.70422	0	44548	1.69377	0
44690	1.69274	0	45037	1.68508	0		44111	1.70573	1	44568	1.69525	0
44710	1.69422	0	45057	1.68654	0		44131	1.70724	0	44588	1.69674	0
44730	1.6957	0	45077	1.688	0		44151	1.70875	0	44608	1.69823	0
44750	1.69718	0	45097	1.68946	0		44171	1.71026	1	44628	1.69971	0
44770	1.69866	0	45117	1.69093	0		44191	1.71177	1	44648	1.7012	0
44790	1.70014	0	45137	1.69239	0		44211	1.71328	0	44668	1.70269	0
44810	1.70162	0	45157	1.69386	0		44231	1.7148	0	44688	1.70418	0
44830	1.70311	0	45177	1.69532	0		44251	1.71631	0	44708	1.70567	0
44850	1.70459	0	45197	1.69679	0		44271	1.71783	0	44728	1.70716	0
44870	1.70608	0	45217	1.69826	0		44291	1.71934	0	44748	1.70865	0
44890	1.70756	0	45237	1.69973	0		44311	1.72086	1	44768	1.71014	0
44910	1.70905	0	45257	1.70119	0		44331	1.72238	0	44788	1.71163	0
44930	1.71053	1	45277	1.70266	0		44351	1.72389	0	44808	1.71313	0
44950	1.71202	0	45297	1.70413	0		44371	1.72541	1	44828	1.71462	0
44970	1.71351	0	45317	1.7056	0		44391	1.72693	0	44848	1.71611	0
44990	1.715	0	45337	1.70707	0		44411	1.72845	0	44868	1.71761	1
45010	1.71649	0	45357	1.70854	0		44431	1.72997	0	44888	1.7191	0
45030	1.71798	0	45377	1.71002	0		44451	1.73149	0	44908	1.7206	0
45050	1.71947	1	45397	1.71149	0		44471	1.73301	0	44928	1.7221	0
45070	1.72096	0	45417	1.71296	0		44491	1.73453	0	44948	1.72359	0
45090	1.72245	0	45437	1.71444	0		44511	1.73606	0	44968	1.72509	0
45110	1.72395	0	45457	1.71591	0		44531	1.73758	0	44988	1.72659	0
45130	1.72544	0	45477	1.71739	0		44551	1.7391	0	45008	1.72809	0
45150	1.72693	0	45497	1.71886	0		44571	1.74063	0	45028	1.72959	0
45170	1.72843	0	45517	1.72034	0		44591	1.74215	0	45048	1.73109	0
45190	1.72992	0	45537	1.72182	0		44611	1.74368	0	45068	1.73259	0
45210	1.73142	0	45557	1.7233	0		44631	1.74521	0	45088	1.73409	0
45230	1.73291	0	45577	1.72477	0		44651	1.74673	1	45108	1.7356	0
45250	1.73441	0	45597	1.72625	0		44671	1.74826	0	45128	1.7371	0
45270	1.73591	0	45617	1.72773	0		44691	1.74979	0	45148	1.7386	0
45290	1.73741	1	45637	1.72921	0		44711	1.75132	1	45168	1.74011	0
45310	1.73891	0	45657	1.73069	0		44731	1.75285	0	45188	1.74161	0
45330	1.74041	0	45677	1.73218	0		44751	1.75438	0	45208	1.74312	0
45350	1.74191	0	45697	1.73366	0		44771	1.75591	0	45228	1.74463	0
45370	1.74341	0	45717	1.73514	1		44791	1.75744	1	45248	1.74613	0
45390	1.74491	0	45737	1.73663	0		44811	1.75898	0	45268	1.74764	0
45410	1.74641	3	45757	1.73811	0		44831	1.76051	0	45288	1.74915	0
45430	1.74792	0	45777	1.73959	0		44851	1.76205	0	45308	1.75066	0
45450	1.74942	0	45797	1.74108	0		44871	1.76358	0	45328	1.75217	0
45470	1.75092	0	45817	1.74257	0		44891	1.76512	1	45348	1.75368	0
45490	1.75243	0	45837	1.74405	0		44911	1.76665	0	45368	1.75519	0
45510	1.75393	0	45857	1.74554	0		44931	1.76819	0	45388	1.7567	0
45530	1.75544	0	45877	1.74703	0		44951	1.76973	0	45408	1.75821	0
45550	1.75695	0	45897	1.74852	0		44971	1.77127	0	45428	1.75973	0
45570	1.75845	0	45917	1.75001	0		44991	1.7728	0	45448	1.76124	0
45590	1.75996	0	45937	1.7515	0		45011	1.77434	0	45468	1.76276	0
45610	1.76147	0	45957	1.75299	0		45031	1.77588	0	45488	1.76427	0
45630	1.76298	0	45977	1.75448	0		45051	1.77742	1	45508	1.76578	0
45650	1.76449	0	45997	1.75597	0		45071	1.77896	0	45528	1.7673	0
45670	1.766	0	46017	1.75746	0		45091	1.78051	0	45548	1.76882	0
45690	1.76751	1	46037	1.75896	0		45111	1.78205	0	45568	1.77034	0
45710	1.76903	0	46057	1.76045	0		45131	1.78359	1	45588	1.77185	0
45730	1.77054	0	46077	1.76194	0		45151	1.78514	0	45608	1.77337	0
45750	1.77205	0	46097	1.76344	0		45171	1.78668	0	45628	1.77489	0
45770	1.77357	1	46117	1.76493	0		45191	1.78823	1	45648	1.77641	0
45790	1.77508	0	46137	1.76643	0		45211	1.78977	1	45668	1.77793	0
45810	1.77659	0	46157	1.76793	0		45231	1.79132	0	45688	1.77946	0
45830	1.77811	0	46177	1.76942	0		45251	1.79287	0	45708	1.78098	0
45850	1.77963	1	46197	1.77092	0		45271	1.79442	1	45728	1.7825	0
45870	1.78114	0	46217	1.77242	0		45291	1.79597	0	45748	1.78402	0
45890	1.78266	0	46237	1.77392	0		45311	1.79751	0	45768	1.78555	0
45910	1.78418	0	46257	1.77542	0		45331	1.79906	0	45788	1.78707	0
45930	1.7857	0	46277	1.77692	0		45351	1.80062	0	45808	1.7886	0
45950	1.78722	0	46297	1.77842	0		45371	1.80217	0	45828	1.79012	0
45970	1.78874	0	46317	1.77992	0		45391	1.80372	0	45848	1.79165	0
45990	1.79026	0	46337	1.78143	0		45411	1.80527	0	45868	1.79318	0
46010	1.79178	0	46357	1.78293	0		45431	1.80683	0	45888	1.79471	0
46030	1.79331	0	46377	1.78443	0		45451	1.80838	0	45908	1.79623	0
46050	1.79483	0	46397	1.78594	0		45471	1.80994	1	45928	1.79776	0
46070	1.79635	0	46417	1.78744	0		45491	1.81149	0	45948	1.79929	0
46090	1.79788	0	46437	1.78895	0		45511	1.81305	0	45968	1.80082	0
46110	1.7994	0	46457	1.79046	0		45531	1.8146	0	45988	1.80235	0
46130	1.80093	0	46477	1.79196	0		45551	1.81616	0	46008	1.80389	0
46150	1.80245	0	46497	1.79347	0		45571	1.81772	0	46028	1.80542	0
46170	1.80398	2	46517	1.79498	0		45591	1.81928	0	46048	1.80695	0
46190	1.80551	0	46537	1.79649	0		45611	1.82084	0	46068	1.80849	0
46210	1.80704	1	46557	1.798	0		45631	1.8224	0	46088	1.81002	0
46230	1.80856	0	46577	1.79951	0		45651	1.82396	2	46108	1.81156	0
46250	1.81009	0	46597	1.80102	0		45671	1.82552	0	46128	1.81309	0
46270	1.81163	0	46617	1.80253	0		45691	1.82708	0	46148	1.81463	0
46290	1.81316	0	46637	1.80404	0		45711	1.82865	0	46168	1.81617	0
46310	1.81469	0	46657	1.80556	0		45731	1.83021	0	46188	1.8177	0
46330	1.81622	1	46677	1.80707	0		45751	1.83177	0	46208	1.81924	0
46350	1.81775	0	46697	1.80858	0		45771	1.83334	0	46228	1.82078	0
46370	1.81929	1	46717	1.8101	0		45791	1.8349	0	46248	1.82232	0
46390	1.82082	0	46737	1.81161	0		45811	1.83647	0	46268	1.82386	0
46410	1.82235	0	46757	1.81313	0		45831	1.83804	0	46288	1.8254	0
46430	1.82389	1	46777	1.81464	0		45851	1.8396	0	46308	1.82694	0
46450	1.82543	0	46797	1.81616	0		45871	1.84117	0	46328	1.82849	0
46470	1.82696	1	46817	1.81768	0		45891	1.84274	0	46348	1.83003	0
46490	1.8285	0	46837	1.8192	0		45911	1.84431	0	46368	1.83157	0
46510	1.83004	0	46857	1.82072	0		45931	1.84588	2	46388	1.83312	0
46530	1.83157	0	46877	1.82224	0		45951	1.84745	1	46408	1.83466	0
46550	1.83311	0	46897	1.82376	0		45971	1.84902	0	46428	1.83621	0
46570	1.83465	0	46917	1.82528	0		45991	1.85059	0	46448	1.83775	0
46590	1.8362	0	46937	1.8268	0		46011	1.85217	0	46468	1.8393	0
46610	1.83774	0	46957	1.82832	0		46031	1.85374	0	46488	1.84085	0
46630	1.83928	0	46977	1.82984	0		46051	1.85532	0	46508	1.8424	0
46650	1.84082	0	46997	1.83137	0		46071	1.85689	0	46528	1.84394	0
46670	1.84236	0	47017	1.83289	0		46091	1.85847	0	46548	1.8455	0
46690	1.84391	0	47037	1.83442	0		46111	1.86004	0	46568	1.84705	0
46710	1.84545	0	47057	1.83594	0		46131	1.86162	0	46588	1.8486	0
46730	1.847	0	47077	1.83747	0		46151	1.8632	0	46608	1.85015	0
46750	1.84854	0	47097	1.83899	0		46171	1.86478	0	46628	1.8517	0
46770	1.85009	0	47117	1.84052	0		46191	1.86635	0	46648	1.85325	0
46790	1.85163	0	47137	1.84205	0		46211	1.86793	1	46668	1.85481	0
46810	1.85318	0	47157	1.84358	0		46231	1.86951	0	46688	1.85636	0
46830	1.85473	0	47177	1.84511	0		46251	1.87109	0	46708	1.85791	0
46850	1.85628	0	47197	1.84664	0		46271	1.87268	0	46728	1.85947	0
46870	1.85783	0	47217	1.84817	0		46291	1.87426	0	46748	1.86102	0
46890	1.85938	0	47237	1.8497	0		46311	1.87584	0	46768	1.86258	0
46910	1.86093	0	47257	1.85123	0		46331	1.87742	0	46788	1.86414	0
46930	1.86248	0	47277	1.85276	0		46351	1.87901	0	46808	1.8657	0
46950	1.86403	0	47297	1.8543	0		46371	1.88059	0	46828	1.86726	0
46970	1.86559	0	47317	1.85583	0		46391	1.88218	0	46848	1.86881	0
46990	1.86714	0	47337	1.85736	0		46411	1.88377	0	46868	1.87037	0
47010	1.86869	0	47357	1.8589	0		46431	1.88535	0	46888	1.87193	0
47030	1.87025	0	47377	1.86044	0		46451	1.88694	0	46908	1.8735	0
47050	1.8718	0	47397	1.86197	0		46471	1.88853	0	46928	1.87506	0
47070	1.87336	0	47417	1.86351	0		46491	1.89012	0	46948	1.87662	0
47090	1.87492	0	47437	1.86505	0		46511	1.89171	0	46968	1.87818	0
47110	1.87647	0	47457	1.86658	0		46531	1.8933	0	46988	1.87975	0
47130	1.87803	0	47477	1.86812	0		46551	1.89489	0	47008	1.88131	0
47150	1.87959	0	47497	1.86966	0		46571	1.89648	0	47028	1.88288	0
47170	1.88115	0	47517	1.8712	0		46591	1.89807	0	47048	1.88444	0
47190	1.88271	0	47537	1.87274	0		46611	1.89966	0	47068	1.88601	0
47210	1.88427	0	47557	1.87428	0		46631	1.90126	0	47088	1.88758	0
47230	1.88583	0	47577	1.87583	0		46651	1.90285	0	47108	1.88914	0
47250	1.88739	0	47597	1.87737	0		46671	1.90445	0	47128	1.89071	0
47270	1.88896	0	47617	1.87891	0		46691	1.90604	0	47148	1.89228	0
47290	1.89052	0	47637	1.88045	0		46711	1.90764	0	47168	1.89385	0
47310	1.89208	0	47657	1.882	0		46731	1.90924	0	47188	1.89542	0
47330	1.89365	0	47677	1.88355	0		46751	1.91083	0	47208	1.89699	0
47350	1.89521	0	47697	1.88509	0		46771	1.91243	0	47228	1.89856	0
47370	1.89678	0	47717	1.88664	0		46791	1.91403	0	47248	1.90014	0
47390	1.89834	0	47737	1.88818	0		46811	1.91563	0	47268	1.90171	0
47410	1.89991	0	47757	1.88973	0		46831	1.91723	0	47288	1.90328	0
47430	1.90148	0	47777	1.89128	0		46851	1.91883	0	47308	1.90486	0
47450	1.90305	0	47797	1.89283	0		46871	1.92043	0	47328	1.90643	0
47470	1.90462	0	47817	1.89438	0		46891	1.92204	0	47348	1.90801	0
47490	1.90619	0	47837	1.89593	0		46911	1.92364	0	47368	1.90958	0
47510	1.90776	0	47857	1.89748	0		46931	1.92524	0	47388	1.91116	0
47530	1.90933	1	47877	1.89903	0		46951	1.92685	0	47408	1.91274	0
47550	1.9109	0	47897	1.90058	0		46971	1.92845	0	47428	1.91431	0
47570	1.91247	0	47917	1.90213	0		46991	1.93006	0	47448	1.91589	0
47590	1.91404	0	47937	1.90369	0		47011	1.93166	0	47468	1.91747	0
47610	1.91562	0	47957	1.90524	0		47031	1.93327	0	47488	1.91905	0
47630	1.91719	0	47977	1.9068	0		47051	1.93488	0	47508	1.92063	0
47650	1.91877	0	47997	1.90835	0		47071	1.93649	0	47528	1.92222	0
47670	1.92034	0	48017	1.90991	0		47091	1.93809	0	47548	1.9238	0
47690	1.92192	0	48037	1.91146	0		47111	1.93971	0	47568	1.92538	0
47710	1.92349	0	48057	1.91302	0		47131	1.94131	0	47588	1.92696	0
47730	1.92507	0	48077	1.91458	0		47151	1.94293	0	47608	1.92855	0
47750	1.92665	0	48097	1.91614	0		47171	1.94454	0	47628	1.93013	0
47770	1.92823	0	48117	1.9177	0		47191	1.94615	0	47648	1.93172	0
47790	1.92981	0	48137	1.91926	0		47211	1.94776	0	47668	1.9333	0
47810	1.93139	1	48157	1.92082	0		47231	1.94938	0	47688	1.93489	0
47830	1.93297	0	48177	1.92238	0		47251	1.95099	0	47708	1.93648	0
47850	1.93455	0	48197	1.92394	0		47271	1.95261	0	47728	1.93806	0
47870	1.93613	0	48217	1.9255	0		47291	1.95422	0	47748	1.93965	0
47890	1.93771	0	48237	1.92706	0		47311	1.95584	0	47768	1.94124	1
47910	1.9393	0	48257	1.92863	0		47331	1.95745	0	47788	1.94283	0
47930	1.94088	0	48277	1.93019	0		47351	1.95907	0	47808	1.94442	0
47950	1.94246	0	48297	1.93176	0		47371	1.96069	0	47828	1.94601	0
47970	1.94405	0	48317	1.93332	0		47391	1.96231	1	47848	1.94761	0
47990	1.94564	0	48337	1.93489	0		47411	1.96393	0	47868	1.9492	0
48010	1.94722	1	48357	1.93645	0		47431	1.96555	0	47888	1.95079	0
48030	1.94881	0	48377	1.93802	0		47451	1.96717	0	47908	1.95239	0
48050	1.9504	0	48397	1.93959	0		47471	1.96879	0	47928	1.95398	0
48070	1.95198	1	48417	1.94116	0		47491	1.97042	1	47948	1.95558	0
48090	1.95357	0	48437	1.94273	0		47511	1.97204	0	47968	1.95717	0
48110	1.95516	0	48457	1.9443	0		47531	1.97366	0	47988	1.95877	0
48130	1.95675	0	48477	1.94587	0		47551	1.97529	0	48008	1.96036	0
48150	1.95834	0	48497	1.94744	0		47571	1.97691	0	48028	1.96196	0
48170	1.95994	0	48517	1.94901	0		47591	1.97854	0	48048	1.96356	0
48190	1.96153	0	48537	1.95058	0		47611	1.98016	0	48068	1.96516	0
48210	1.96312	0	48557	1.95216	0		47631	1.98179	0	48088	1.96676	0
48230	1.96471	0	48577	1.95373	0		47651	1.98342	0	48108	1.96836	0
48250	1.96631	0	48597	1.9553	0		47671	1.98505	0	48128	1.96996	0
48270	1.9679	0	48617	1.95688	0		47691	1.98667	0	48148	1.97156	0
48290	1.9695	0	48637	1.95845	0		47711	1.9883	0	48168	1.97316	0
48310	1.9711	0	48657	1.96003	0		47731	1.98994	0	48188	1.97477	0
48330	1.97269	0	48677	1.96161	0		47751	1.99157	0	48208	1.97637	0
48350	1.97429	0	48697	1.96318	0		47771	1.9932	0	48228	1.97797	0
48370	1.97589	0	48717	1.96476	0		47791	1.99483	0	48248	1.97958	0
48390	1.97748	0	48737	1.96634	0		47811	1.99646	0	48268	1.98118	1
48410	1.97908	0	48757	1.96792	0		47831	1.9981	0	48288	1.98279	0
48430	1.98069	0	48777	1.9695	0		47851	1.99973	0	48308	1.9844	0
48450	1.98229	0	48797	1.97108	0		47871	2.00137	0	48328	1.986	0
48470	1.98389	0	48817	1.97266	0		47891	2.003	0	48348	1.98761	0
48490	1.98549	0	48837	1.97424	0		47911	2.00464	0	48368	1.98922	0
48510	1.98709	0	48857	1.97583	0		47931	2.00628	1	48388	1.99083	0
48530	1.98869	0	48877	1.97741	0		47951	2.00791	0	48408	1.99244	0
48550	1.9903	0	48897	1.97899	0		47971	2.00955	0	48428	1.99405	0
48570	1.9919	0	48917	1.98058	0		47991	2.01119	0	48448	1.99566	0
48590	1.99351	0	48937	1.98216	0		48011	2.01283	0	48468	1.99727	0
48610	1.99511	0	48957	1.98375	0		48031	2.01447	104	48488	1.99889	0
48630	1.99672	0	48977	1.98533	0		48051	2.01611	176	48508	2.0005	0
48650	1.99833	0	48997	1.98692	0		48071	2.01775	34	48528	2.00211	0
48670	1.99994	0	49017	1.98851	0		48091	2.01939	0	48548	2.00373	0
48690	2.00154	0	49037	1.9901	1		48111	2.02104	3	48568	2.00534	0
48710	2.00315	0	49057	1.99168	0		48131	2.02268	0	48588	2.00696	0
48730	2.00476	0	49077	1.99327	0		48151	2.02433	1	48608	2.00857	1
48750	2.00637	0	49097	1.99487	0		48171	2.02597	2	48628	2.01019	0
48770	2.00798	0	49117	1.99646	0		48191	2.02762	0	48648	2.01181	0
48790	2.00959	0	49137	1.99805	0		48211	2.02926	0	48668	2.01343	2
48810	2.01121	1	49157	1.99964	0		48231	2.03091	1	48688	2.01505	228
48830	2.01282	0	49177	2.00123	0		48251	2.03256	0	48708	2.01667	679
48850	2.01443	89	49197	2.00283	0		48271	2.03421	0	48728	2.01829	11
48870	2.01605	216	49217	2.00442	0		48291	2.03586	0	48748	2.01991	1
48890	2.01766	77	49237	2.00601	1		48311	2.0375	0	48768	2.02153	0
48910	2.01928	2	49257	2.00761	0		48331	2.03916	0	48788	2.02315	1
48930	2.02089	1	49277	2.0092	0		48351	2.04081	0	48808	2.02478	0
48950	2.02251	0	49297	2.0108	1		48371	2.04246	0	48828	2.0264	1
48970	2.02413	0	49317	2.0124	2		48391	2.04411	0	48848	2.02802	0
48990	2.02575	0	49337	2.01399	49		48411	2.04576	0	48868	2.02965	0
49010	2.02737	0	49357	2.01559	1028		48431	2.04742	0	48888	2.03127	0
49030	2.02898	0	49377	2.01719	45		48451	2.04907	0	48908	2.0329	0
49050	2.0306	0	49397	2.01879	2		48471	2.05073	0	48928	2.03453	0
49070	2.03222	1	49417	2.02039	0		48491	2.05238	0	48948	2.03615	0
49090	2.03385	0	49437	2.02199	0		48511	2.05404	0	48968	2.03778	0
49110	2.03547	0	49457	2.02359	0		48531	2.0557	0	48988	2.03941	0
49130	2.03709	0	49477	2.0252	0		48551	2.05735	0	49008	2.04104	0
49150	2.03871	1	49497	2.0268	0		48571	2.05901	1	49028	2.04267	0
49170	2.04034	0	49517	2.0284	0		48591	2.06067	0	49048	2.0443	0
49190	2.04196	0	49537	2.03001	0		48611	2.06233	0	49068	2.04593	0
49210	2.04359	0	49557	2.03161	0		48631	2.06399	0	49088	2.04757	0
49230	2.04521	1	49577	2.03322	1		48651	2.06565	0	49108	2.0492	0
49250	2.04684	0	49597	2.03482	0		48671	2.06731	0	49128	2.05083	0
49270	2.04847	1	49617	2.03643	1		48691	2.06898	0	49148	2.05247	0
49290	2.05009	0	49637	2.03804	0		48711	2.07064	0	49168	2.0541	0
49310	2.05172	0	49657	2.03965	0		48731	2.0723	1	49188	2.05574	0
49330	2.05335	0	49677	2.04125	0		48751	2.07397	0	49208	2.05737	0
49350	2.05498	0	49697	2.04286	0		48771	2.07563	0	49228	2.05901	0
49370	2.05661	0	49717	2.04447	0		48791	2.0773	0	49248	2.06065	0
49390	2.05824	0	49737	2.04608	0		48811	2.07897	0	49268	2.06229	0
49410	2.05987	0	49757	2.04769	0		48831	2.08063	0	49288	2.06392	0
49430	2.06151	0	49777	2.0493	0		48851	2.0823	0	49308	2.06556	0
49450	2.06314	0	49797	2.05092	0		48871	2.08397	0	49328	2.0672	0
49470	2.06477	1	49817	2.05253	0		48891	2.08564	0	49348	2.06884	0
49490	2.06641	0	49837	2.05414	0		48911	2.08731	0	49368	2.07048	0
49510	2.06804	0	49857	2.05576	0		48931	2.08898	0	49388	2.07213	0
49530	2.06968	0	49877	2.05737	0		48951	2.09065	0	49408	2.07377	0
49550	2.07131	0	49897	2.05899	0		48971	2.09232	1	49428	2.07541	0
49570	2.07295	0	49917	2.0606	0		48991	2.09399	0	49448	2.07706	0
49590	2.07459	0	49937	2.06222	0		49011	2.09567	0	49468	2.0787	0
49610	2.07623	0	49957	2.06384	0		49031	2.09734	0	49488	2.08034	0
49630	2.07787	0	49977	2.06546	0		49051	2.09901	0	49508	2.08199	0
49650	2.07951	0	49997	2.06707	0		49071	2.10069	0	49528	2.08364	0
49670	2.08114	0	50017	2.06869	0		49091	2.10236	6	49548	2.08528	0
49690	2.08278	0	50037	2.07031	0		49111	2.10404	1	49568	2.08693	0
49710	2.08443	1	50057	2.07193	0		49131	2.10572	0	49588	2.08858	0
49730	2.08607	0	50077	2.07355	0		49151	2.1074	0	49608	2.09023	0
49750	2.08771	0	50097	2.07518	0		49171	2.10907	0	49628	2.09188	0
49770	2.08935	0	50117	2.0768	0		49191	2.11075	1	49648	2.09353	0
49790	2.091	0	50137	2.07842	0		49211	2.11243	0	49668	2.09518	0
49810	2.09264	0	50157	2.08005	0		49231	2.11411	0	49688	2.09683	0
49830	2.09429	0	50177	2.08167	0		49251	2.11579	0	49708	2.09849	0
49850	2.09593	0	50197	2.0833	0		49271	2.11748	0	49728	2.10014	0
49870	2.09758	0	50217	2.08492	0		49291	2.11916	0	49748	2.10179	0
49890	2.09923	0	50237	2.08655	0		49311	2.12084	0	49768	2.10344	0
49910	2.10087	0	50257	2.08817	0		49331	2.12253	0	49788	2.1051	0
49930	2.10252	0	50277	2.0898	0		49351	2.12421	0	49808	2.10676	0
49950	2.10417	4	50297	2.09143	0		49371	2.12589	0	49828	2.10841	0
49970	2.10582	1	50317	2.09306	0		49391	2.12758	0	49848	2.11007	0
49990	2.10747	0	50337	2.09469	0		49411	2.12927	0	49868	2.11173	0
50010	2.10912	0	50357	2.09632	0		49431	2.13096	0	49888	2.11338	0
50030	2.11078	0	50377	2.09795	0		49451	2.13264	0	49908	2.11504	0
50050	2.11243	0	50397	2.09958	0		49471	2.13433	0	49928	2.1167	0
50070	2.11408	0	50417	2.10121	0		49491	2.13602	0	49948	2.11836	0
50090	2.11573	0	50437	2.10284	0		49511	2.13771	0	49968	2.12002	0
50110	2.11739	0	50457	2.10448	0		49531	2.1394	0	49988	2.12168	0
50130	2.11904	0	50477	2.10611	0		49551	2.14109	0	50008	2.12335	0
50150	2.1207	0	50497	2.10775	0		49571	2.14278	0	50028	2.12501	0
50170	2.12236	0	50517	2.10938	0		49591	2.14448	0	50048	2.12667	0
50190	2.12401	0	50537	2.11102	0		49611	2.14617	0	50068	2.12834	0
50210	2.12567	0	50557	2.11265	0		49631	2.14786	0	50088	2.13	0
50230	2.12733	0	50577	2.11429	0		49651	2.14956	0	50108	2.13167	0
50250	2.12899	0	50597	2.11593	0		49671	2.15125	0	50128	2.13333	0
50270	2.13065	0	50617	2.11757	0		49691	2.15295	0	50148	2.135	0
50290	2.13231	0	50637	2.11921	0		49711	2.15464	0	50168	2.13667	0
50310	2.13397	1	50657	2.12084	0		49731	2.15634	0	50188	2.13834	0
50330	2.13563	0	50677	2.12249	0		49751	2.15804	0	50208	2.14	0
50350	2.13729	0	50697	2.12412	0		49771	2.15974	0	50228	2.14167	0
50370	2.13895	0	50717	2.12577	0		49791	2.16144	0	50248	2.14334	0
50390	2.14062	0	50737	2.12741	0		49811	2.16314	0	50268	2.14501	0
50410	2.14228	0	50757	2.12905	0		49831	2.16484	0	50288	2.14668	0
50430	2.14394	0	50777	2.13069	0		49851	2.16654	0	50308	2.14836	0
50450	2.14561	0	50797	2.13234	0		49871	2.16824	0	50328	2.15003	0
50470	2.14728	0	50817	2.13398	0		49891	2.16994	0	50348	2.1517	0
50490	2.14894	0	50837	2.13563	0		49911	2.17165	0	50368	2.15338	0
50494	2.14928	1	50841	2.13596	0		49915	2.17199	0	50372	2.15371	1
50514	2.15094	0	50861	2.1376	0		49935	2.17369	0	50392	2.15538	0
50534	2.15261	0	50881	2.13925	0		49955	2.1754	0	50412	2.15706	0
50554	2.15428	0	50901	2.1409	0		49975	2.1771	0	50432	2.15874	0
50574	2.15595	0	50921	2.14255	0		49995	2.17881	0	50452	2.16041	0
50594	2.15762	0	50941	2.14419	0		50015	2.18051	0	50472	2.16209	0
50614	2.15929	0	50961	2.14584	0		50035	2.18222	0	50492	2.16377	0
50634	2.16096	0	50981	2.14749	0		50055	2.18393	0	50512	2.16545	0
50654	2.16263	0	51001	2.14914	0		50075	2.18564	0	50532	2.16712	0
50674	2.16431	0	51021	2.1508	0		50095	2.18735	0	50552	2.1688	0
50694	2.16598	0	51041	2.15245	0		50115	2.18906	0	50572	2.17049	0
50714	2.16765	0	51061	2.1541	0		50135	2.19077	0	50592	2.17217	0
50734	2.16933	2	51081	2.15575	0		50155	2.19248	0	50612	2.17385	0
50754	2.171	0	51101	2.1574	0		50175	2.19419	0	50632	2.17553	0
50774	2.17268	0	51121	2.15906	0		50195	2.1959	0	50652	2.17721	0
50794	2.17435	0	51141	2.16071	0		50215	2.19762	0	50672	2.1789	0
50814	2.17603	0	51161	2.16237	0		50235	2.19933	0	50692	2.18058	0
50834	2.17771	0	51181	2.16403	0		50255	2.20105	0	50712	2.18227	0
50854	2.17939	0	51201	2.16568	0		50275	2.20276	0	50732	2.18395	0
50874	2.18107	0	51221	2.16734	0		50295	2.20448	0	50752	2.18564	0
50894	2.18275	0	51241	2.169	0		50315	2.20619	0	50772	2.18732	0
50914	2.18443	0	51261	2.17066	0		50335	2.20791	0	50792	2.18901	0
50934	2.18611	0	51281	2.17232	0		50355	2.20963	0	50812	2.1907	0
50954	2.18779	0	51301	2.17398	0		50375	2.21135	0	50832	2.19239	0
50974	2.18947	0	51321	2.17564	0		50395	2.21307	0	50852	2.19408	0
50994	2.19115	0	51341	2.1773	0		50415	2.21479	0	50872	2.19577	0
51014	2.19284	0	51361	2.17896	0		50435	2.21651	1	50892	2.19746	0
51034	2.19452	0	51381	2.18062	0		50455	2.21823	0	50912	2.19915	0
51054	2.1962	0	51401	2.18228	0		50475	2.21995	0	50932	2.20084	0
51074	2.19789	0	51421	2.18395	0		50495	2.22167	0	50952	2.20254	0
51094	2.19958	0	51441	2.18561	0		50515	2.2234	0	50972	2.20423	0
51114	2.20126	1	51461	2.18728	0		50535	2.22512	0	50992	2.20592	0
51134	2.20295	0	51481	2.18894	0		50555	2.22684	0	51012	2.20762	0
51154	2.20464	0	51501	2.19061	0		50575	2.22857	0	51032	2.20931	0
51174	2.20633	0	51521	2.19228	0		50595	2.2303	0	51052	2.21101	0
51194	2.20802	0	51541	2.19394	0		50615	2.23202	0	51072	2.21271	0
51214	2.20971	0	51561	2.19561	0		50635	2.23375	0	51092	2.2144	0
51234	2.2114	0	51581	2.19728	0		50655	2.23548	0	51112	2.2161	0
51254	2.21309	0	51601	2.19895	0		50675	2.23721	0	51132	2.2178	0
51274	2.21478	0	51621	2.20062	0		50695	2.23894	0	51152	2.2195	0
51294	2.21647	0	51641	2.20229	0		50715	2.24067	1	51172	2.2212	0
51314	2.21817	0	51661	2.20396	0		50735	2.2424	0	51192	2.2229	0
51334	2.21986	0	51681	2.20564	0		50755	2.24413	0	51212	2.2246	0
51354	2.22155	0	51701	2.20731	0		50775	2.24586	0	51232	2.2263	0
51374	2.22325	0	51721	2.20898	0		50795	2.24759	0	51252	2.22801	0
51394	2.22494	1	51741	2.21066	0		50815	2.24933	0	51272	2.22971	0
51414	2.22664	0	51761	2.21233	0		50835	2.25106	0	51292	2.23141	0
51434	2.22834	0	51781	2.214	0		50855	2.25279	0	51312	2.23312	0
51454	2.23004	0	51801	2.21568	0		50875	2.25453	0	51332	2.23482	0
51474	2.23174	0	51821	2.21736	0		50895	2.25627	0	51352	2.23653	0
51494	2.23343	0	51841	2.21903	0		50915	2.258	0	51372	2.23823	0
51514	2.23513	0	51861	2.22071	0		50935	2.25974	0	51392	2.23994	0
51534	2.23683	0	51881	2.22239	0		50955	2.26148	0	51412	2.24165	0
51554	2.23854	0	51901	2.22407	0		50975	2.26322	0	51432	2.24336	0
51574	2.24024	0	51921	2.22575	0		50995	2.26496	0	51452	2.24507	0
51594	2.24194	0	51941	2.22743	0		51015	2.2667	0	51472	2.24678	0
51614	2.24364	0	51961	2.22911	0		51035	2.26844	0	51492	2.24849	0
51634	2.24534	0	51981	2.23079	0		51055	2.27018	0	51512	2.2502	0
51654	2.24705	0	52001	2.23247	0		51075	2.27192	0	51532	2.25191	0
51674	2.24875	0	52021	2.23416	0		51095	2.27366	0	51552	2.25362	0
51694	2.25046	0	52041	2.23584	0		51115	2.27541	1	51572	2.25533	0
51714	2.25217	0	52061	2.23752	0		51135	2.27715	0	51592	2.25705	0
51734	2.25387	0	52081	2.23921	0		51155	2.2789	0	51612	2.25876	0
51754	2.25558	1	52101	2.24089	0		51175	2.28064	0	51632	2.26048	0
51774	2.25729	0	52121	2.24258	0		51195	2.28239	0	51652	2.26219	0
51794	2.259	0	52141	2.24427	0		51215	2.28413	0	51672	2.26391	0
51814	2.26071	0	52161	2.24595	0		51235	2.28588	0	51692	2.26562	0
51834	2.26242	0	52181	2.24764	0		51255	2.28763	0	51712	2.26734	0
51854	2.26413	0	52201	2.24933	0		51275	2.28938	0	51732	2.26906	0
51874	2.26584	0	52221	2.25102	0		51295	2.29113	0	51752	2.27078	0
51894	2.26755	1	52241	2.25271	0		51315	2.29288	0	51772	2.2725	0
51914	2.26926	1	52261	2.2544	0		51335	2.29463	0	51792	2.27422	0
51934	2.27097	1	52281	2.25609	0		51355	2.29638	0	51812	2.27594	0
51954	2.27269	0	52301	2.25778	0		51375	2.29813	0	51832	2.27766	0
51974	2.2744	0	52321	2.25947	0		51395	2.29989	0	51852	2.27938	0
51994	2.27612	0	52341	2.26117	0		51415	2.30164	0	51872	2.28111	0
52014	2.27784	0	52361	2.26286	0		51435	2.30339	0	51892	2.28283	0
52034	2.27955	0	52381	2.26455	0		51455	2.30515	0	51912	2.28455	0
52054	2.28127	0	52401	2.26625	0		51475	2.3069	0	51932	2.28628	0
52074	2.28299	0	52421	2.26795	0		51495	2.30866	0	51952	2.288	0
52094	2.2847	0	52441	2.26964	0		51515	2.31041	0	51972	2.28973	0
52114	2.28642	0	52461	2.27134	0		51535	2.31217	0	51992	2.29146	0
52134	2.28814	0	52481	2.27304	0		51555	2.31393	0	52012	2.29318	0
52154	2.28986	0	52501	2.27473	0		51575	2.31569	0	52032	2.29491	0
52174	2.29158	0	52521	2.27643	0		51595	2.31745	0	52052	2.29664	0
52194	2.29331	0	52541	2.27813	0		51615	2.31921	0	52072	2.29837	0
52214	2.29503	0	52561	2.27983	0		51635	2.32097	0	52092	2.3001	0
52234	2.29675	0	52581	2.28153	0		51655	2.32273	0	52112	2.30183	0
52254	2.29847	0	52601	2.28323	0		51675	2.32449	0	52132	2.30356	0
52274	2.3002	0	52621	2.28493	0		51695	2.32626	0	52152	2.30529	0
52294	2.30192	0	52641	2.28664	0		51715	2.32802	0	52172	2.30702	0
52314	2.30365	0	52661	2.28834	0		51735	2.32978	0	52192	2.30876	0
52334	2.30538	0	52681	2.29004	0		51755	2.33155	0	52212	2.31049	0
52354	2.3071	0	52701	2.29175	0		51775	2.33331	0	52232	2.31223	0
52374	2.30883	0	52721	2.29345	0		51795	2.33508	0	52252	2.31396	0
52394	2.31056	0	52741	2.29516	0		51815	2.33685	0	52272	2.3157	0
52414	2.31229	0	52761	2.29686	1		51835	2.33861	0	52292	2.31743	0
52434	2.31402	0	52781	2.29857	0		51855	2.34038	0	52312	2.31917	0
52454	2.31575	1	52801	2.30028	0		51875	2.34215	0	52332	2.32091	0
52474	2.31748	0	52821	2.30199	0		51895	2.34392	0	52352	2.32265	0
52494	2.31921	0	52841	2.30369	0		51915	2.34569	0	52372	2.32438	0
52514	2.32094	0	52861	2.3054	0		51935	2.34746	0	52392	2.32613	0
52534	2.32267	0	52881	2.30712	0		51955	2.34923	0	52412	2.32787	0
52554	2.32441	0	52901	2.30883	0		51975	2.351	0	52432	2.32961	0
52574	2.32614	0	52921	2.31054	0		51995	2.35278	0	52452	2.33135	0
52594	2.32787	0	52941	2.31225	0		52015	2.35455	0	52472	2.33309	0
52614	2.32961	0	52961	2.31396	0		52035	2.35633	0	52492	2.33483	0
52634	2.33134	0	52981	2.31568	0		52055	2.3581	0	52512	2.33658	0
52654	2.33308	0	53001	2.31739	0		52075	2.35988	0	52532	2.33832	0
52674	2.33482	0	53021	2.3191	0		52095	2.36165	0	52552	2.34007	0
52694	2.33656	0	53041	2.32082	0		52115	2.36343	0	52572	2.34181	0
52714	2.3383	0	53061	2.32253	0		52135	2.36521	0	52592	2.34356	0
52734	2.34003	0	53081	2.32425	0		52155	2.36698	0	52612	2.3453	0
52754	2.34177	0	53101	2.32597	0		52175	2.36876	0	52632	2.34705	0
52774	2.34351	0	53121	2.32768	0		52195	2.37054	0	52652	2.3488	0
52794	2.34525	0	53141	2.3294	0		52215	2.37232	1	52672	2.35055	0
52814	2.347	0	53161	2.33112	0		52235	2.3741	1	52692	2.3523	0
52834	2.34874	0	53181	2.33284	0		52255	2.37588	0	52712	2.35405	0
52854	2.35048	0	53201	2.33456	0		52275	2.37767	0	52732	2.3558	0
52874	2.35223	0	53221	2.33628	0		52295	2.37945	0	52752	2.35755	0
52894	2.35397	0	53241	2.338	0		52315	2.38123	0	52772	2.3593	0
52914	2.35572	0	53261	2.33973	0		52335	2.38302	0	52792	2.36105	0
52934	2.35746	0	53281	2.34145	0		52355	2.3848	0	52812	2.36281	0
52954	2.35921	0	53301	2.34317	0		52375	2.38659	0	52832	2.36456	0
52974	2.36095	0	53321	2.3449	0		52395	2.38837	0	52852	2.36632	0
52994	2.3627	0	53341	2.34662	0		52415	2.39016	0	52872	2.36807	0
53014	2.36445	0	53361	2.34835	0		52435	2.39195	0	52892	2.36983	0
53034	2.3662	1	53381	2.35007	0		52455	2.39374	0	52912	2.37158	0
53054	2.36795	0	53401	2.3518	0		52475	2.39552	0	52932	2.37334	0
53074	2.3697	0	53421	2.35352	0		52495	2.39731	0	52952	2.3751	0
53094	2.37145	0	53441	2.35525	0		52515	2.3991	0	52972	2.37686	1
53114	2.3732	0	53461	2.35698	0		52535	2.40089	0	52992	2.37862	0
53134	2.37495	0	53481	2.35871	0		52555	2.40269	0	53012	2.38037	0
53154	2.3767	0	53501	2.36044	0		52575	2.40448	0	53032	2.38214	0
53174	2.37846	0	53521	2.36217	0		52595	2.40627	0	53052	2.3839	0
53194	2.38021	0	53541	2.3639	0		52615	2.40807	0	53072	2.38566	0
53214	2.38197	0	53561	2.36563	0		52635	2.40986	0	53092	2.38742	0
53234	2.38372	0	53581	2.36736	0		52655	2.41165	0	53112	2.38918	0
53254	2.38548	0	53601	2.3691	0		52675	2.41345	0	53132	2.39095	0
53274	2.38723	0	53621	2.37083	0		52695	2.41525	0	53152	2.39271	0
53294	2.38899	0	53641	2.37257	0		52715	2.41704	0	53172	2.39448	0
53314	2.39075	0	53661	2.3743	0		52735	2.41884	0	53192	2.39624	0
53334	2.39251	0	53681	2.37604	0		52755	2.42064	0	53212	2.39801	0
53354	2.39427	0	53701	2.37777	0		52775	2.42244	0	53232	2.39978	0
53374	2.39603	0	53721	2.37951	0		52795	2.42424	0	53252	2.40154	0
53394	2.39779	0	53741	2.38125	0		52815	2.42604	0	53272	2.40331	0
53414	2.39955	0	53761	2.38298	1		52835	2.42784	0	53292	2.40508	0
53434	2.40131	0	53781	2.38472	0		52855	2.42964	0	53312	2.40685	0
53454	2.40307	0	53801	2.38646	0		52875	2.43144	0	53332	2.40862	0
53474	2.40483	0	53821	2.3882	0		52895	2.43324	0	53352	2.41039	0
53494	2.4066	0	53841	2.38994	0		52915	2.43505	0	53372	2.41216	0
53514	2.40836	0	53861	2.39168	0		52935	2.43685	0	53392	2.41393	0
53534	2.41013	0	53881	2.39342	0		52955	2.43866	0	53412	2.41571	0
53554	2.41189	0	53901	2.39517	0		52975	2.44046	0	53432	2.41748	0
53574	2.41366	0	53921	2.39691	0		52995	2.44227	0	53452	2.41926	0
53594	2.41543	0	53941	2.39865	0		53015	2.44408	0	53472	2.42103	0
53614	2.41719	0	53961	2.4004	0		53035	2.44588	0	53492	2.42281	0
53634	2.41896	0	53981	2.40214	0		53055	2.44769	0	53512	2.42458	0
53654	2.42073	0	54001	2.40389	0		53075	2.4495	0	53532	2.42636	0
53674	2.4225	0	54021	2.40563	0		53095	2.45131	0	53552	2.42814	0
53694	2.42427	0	54041	2.40738	0		53115	2.45312	0	53572	2.42991	0
53714	2.42604	0	54061	2.40913	0		53135	2.45493	0	53592	2.43169	0
53734	2.42781	0	54081	2.41088	0		53155	2.45674	0	53612	2.43347	0
53754	2.42958	0	54101	2.41262	0		53175	2.45855	0	53632	2.43525	0
53774	2.43136	0	54121	2.41438	0		53195	2.46037	0	53652	2.43703	0
53794	2.43313	0	54141	2.41613	0		53215	2.46218	0	53672	2.43881	0
53814	2.4349	0	54161	2.41787	0		53235	2.46399	0	53692	2.4406	0
53834	2.43668	0	54181	2.41963	0		53255	2.46581	0	53712	2.44238	0
53854	2.43845	0	54201	2.42138	0		53275	2.46762	0	53732	2.44416	0
53874	2.44023	0	54221	2.42313	0		53295	2.46944	0	53752	2.44595	0
53894	2.44201	0	54241	2.42488	0		53315	2.47126	0	53772	2.44773	0
53914	2.44378	0	54261	2.42664	0		53335	2.47308	0	53792	2.44951	0
53934	2.44556	0	54281	2.42839	0		53355	2.47489	0	53812	2.4513	0
53954	2.44734	0	54301	2.43015	0		53375	2.47671	0	53832	2.45309	0
53974	2.44912	0	54321	2.4319	0		53395	2.47853	0	53852	2.45487	0
53994	2.4509	0	54341	2.43366	0		53415	2.48035	0	53872	2.45666	0
54014	2.45268	0	54361	2.43542	0		53435	2.48217	0	53892	2.45845	0
54034	2.45446	0	54381	2.43717	0		53455	2.484	0	53912	2.46024	0
54054	2.45624	0	54401	2.43893	0		53475	2.48582	0	53932	2.46203	0
54074	2.45803	0	54421	2.44069	0		53495	2.48764	0	53952	2.46382	0
54094	2.45981	0	54441	2.44245	0		53515	2.48946	0	53972	2.46561	0
54114	2.46159	0	54461	2.44421	0		53535	2.49129	0	53992	2.4674	0
54134	2.46338	0	54481	2.44597	0		53555	2.49311	0	54012	2.46919	0
54154	2.46516	0	54501	2.44773	1		53575	2.49494	0	54032	2.47099	0
54174	2.46695	0	54521	2.44949	0		53595	2.49676	0	54052	2.47278	0
54194	2.46873	0	54541	2.45126	0		53615	2.49859	0	54072	2.47458	0
54214	2.47052	0	54561	2.45302	0		53635	2.50042	0	54092	2.47637	0
54234	2.47231	0	54581	2.45478	0		53655	2.50225	0	54112	2.47817	0
54254	2.4741	0	54601	2.45655	0		53675	2.50408	0	54132	2.47996	0
54274	2.47588	0	54621	2.45831	0		53695	2.5059	0	54152	2.48176	0
54294	2.47767	0	54641	2.46008	0		53715	2.50774	0	54172	2.48356	0
54314	2.47946	0	54661	2.46185	0		53735	2.50957	0	54192	2.48536	0
54334	2.48125	0	54681	2.46361	0		53755	2.5114	0	54212	2.48715	0
54354	2.48305	0	54701	2.46538	1		53775	2.51323	0	54232	2.48895	0
54374	2.48484	0	54721	2.46715	0		53795	2.51506	0	54252	2.49075	0
54394	2.48663	0	54741	2.46892	0		53815	2.5169	0	54272	2.49255	0
54414	2.48842	0	54761	2.47069	0		53835	2.51873	0	54292	2.49436	0
54434	2.49022	0	54781	2.47246	0		53855	2.52057	0	54312	2.49616	0
54454	2.49201	0	54801	2.47423	0		53875	2.5224	0	54332	2.49796	0
54474	2.49381	0	54821	2.476	0		53895	2.52424	0	54352	2.49976	0
54494	2.4956	0	54841	2.47777	0		53915	2.52608	0	54372	2.50157	0
54514	2.4974	0	54861	2.47955	0		53935	2.52791	0	54392	2.50337	0
54534	2.4992	0	54881	2.48132	0		53955	2.52975	0	54412	2.50518	0
54554	2.501	0	54901	2.48309	0		53975	2.53159	0	54432	2.50698	0
54574	2.50279	0	54921	2.48487	0		53995	2.53343	0	54452	2.50879	0
54594	2.50459	0	54941	2.48664	0		54015	2.53527	0	54472	2.5106	0
54614	2.50639	0	54961	2.48842	0		54035	2.53711	0	54492	2.51241	0
54634	2.50819	0	54981	2.4902	0		54055	2.53895	0	54512	2.51421	0
54654	2.51	0	55001	2.49197	0		54075	2.54079	0	54532	2.51602	0
54674	2.5118	0	55021	2.49375	0		54095	2.54264	0	54552	2.51783	0
54694	2.5136	0	55041	2.49553	0		54115	2.54448	0	54572	2.51964	0
54714	2.5154	0	55061	2.49731	0		54135	2.54632	0	54592	2.52146	0
54734	2.51721	0	55081	2.49909	0		54155	2.54817	0	54612	2.52327	0
54754	2.51901	0	55101	2.50087	0		54175	2.55002	0	54632	2.52508	0
54774	2.52082	0	55121	2.50265	0		54195	2.55186	0	54652	2.52689	0
54794	2.52262	0	55141	2.50443	0		54215	2.55371	0	54672	2.52871	0
54814	2.52443	0	55161	2.50621	0		54235	2.55556	0	54692	2.53052	0
54834	2.52623	0	55181	2.508	0		54255	2.55741	0	54712	2.53234	0
54854	2.52804	0	55201	2.50978	0		54275	2.55925	0	54732	2.53415	0
54874	2.52985	0	55221	2.51156	0		54295	2.5611	0	54752	2.53597	0
54894	2.53166	0	55241	2.51335	0		54315	2.56295	0	54772	2.53778	0
54914	2.53347	0	55261	2.51513	0		54335	2.5648	0	54792	2.5396	0
54934	2.53528	0	55281	2.51692	0		54355	2.56666	0	54812	2.54142	0
54954	2.53709	1	55301	2.51871	0		54375	2.56851	0	54832	2.54324	0
54974	2.5389	0	55321	2.52049	0		54395	2.57036	0	54852	2.54506	0
54994	2.54071	0	55341	2.52228	0		54415	2.57221	0	54872	2.54688	0
55014	2.54253	0	55361	2.52407	0		54435	2.57407	0	54892	2.5487	0
55034	2.54434	0	55381	2.52586	0		54455	2.57592	0	54912	2.55052	0
55054	2.54615	0	55401	2.52765	0		54475	2.57778	0	54932	2.55234	0
55074	2.54797	0	55421	2.52944	0		54495	2.57964	0	54952	2.55417	0
55094	2.54978	0	55441	2.53123	0		54515	2.58149	0	54972	2.55599	0
55114	2.5516	0	55461	2.53302	0		54535	2.58335	0	54992	2.55782	0
55134	2.55342	0	55481	2.53482	0		54555	2.58521	0	55012	2.55964	0
55154	2.55523	0	55501	2.53661	0		54575	2.58707	0	55032	2.56147	0
55174	2.55705	0	55521	2.5384	0		54595	2.58893	0	55052	2.56329	0
55194	2.55887	0	55541	2.5402	0		54615	2.59079	0	55072	2.56512	0
55214	2.56069	0	55561	2.54199	0		54635	2.59265	0	55092	2.56695	0
55234	2.56251	0	55581	2.54379	0		54655	2.59451	0	55112	2.56877	0
55254	2.56433	0	55601	2.54558	0		54675	2.59637	0	55132	2.5706	0
55274	2.56615	0	55621	2.54738	0		54695	2.59824	0	55152	2.57243	0
55294	2.56797	0	55641	2.54918	0		54715	2.6001	0	55172	2.57426	0
55314	2.5698	0	55661	2.55098	0		54735	2.60196	0	55192	2.57609	0
55334	2.57162	0	55681	2.55278	0		54755	2.60383	0	55212	2.57793	0
55354	2.57344	0	55701	2.55457	0		54775	2.60569	0	55232	2.57976	0
55374	2.57527	1	55721	2.55638	0		54795	2.60756	0	55252	2.58159	0
55394	2.57709	0	55741	2.55818	0		54815	2.60943	0	55272	2.58342	0
55414	2.57892	0	55761	2.55998	0		54835	2.6113	0	55292	2.58526	0
55434	2.58074	0	55781	2.56178	0		54855	2.61316	0	55312	2.58709	0
55454	2.58257	0	55801	2.56358	0		54875	2.61503	0	55332	2.58893	0
55474	2.5844	0	55821	2.56539	0		54895	2.6169	0	55352	2.59076	0
55494	2.58623	0	55841	2.56719	0		54915	2.61877	0	55372	2.5926	0
55514	2.58806	0	55861	2.56899	0		54935	2.62064	0	55392	2.59444	0
55534	2.58989	0	55881	2.5708	0		54955	2.62251	0	55412	2.59627	0
55554	2.59172	0	55901	2.5726	0		54975	2.62439	0	55432	2.59811	0
55574	2.59355	0	55921	2.57441	0		54995	2.62626	0	55452	2.59995	0
55594	2.59538	0	55941	2.57622	0		55015	2.62813	0	55472	2.60179	0
55614	2.59721	0	55961	2.57802	0		55035	2.63001	0	55492	2.60363	0
55634	2.59904	0	55981	2.57983	0		55055	2.63188	0	55512	2.60547	0
55654	2.60088	0	56001	2.58164	0		55075	2.63376	0	55532	2.60731	0
55674	2.60271	0	56021	2.58345	0		55095	2.63564	0	55552	2.60916	0
55694	2.60455	0	56041	2.58526	0		55115	2.63751	0	55572	2.611	0
55714	2.60638	0	56061	2.58707	0		55135	2.63939	0	55592	2.61284	0
55734	2.60822	0	56081	2.58888	0		55155	2.64127	0	55612	2.61469	0
55754	2.61005	0	56101	2.5907	0		55175	2.64315	0	55632	2.61653	0
55774	2.61189	1	56121	2.59251	0		55195	2.64503	0	55652	2.61838	0
55794	2.61373	0	56141	2.59432	0		55215	2.64691	0	55672	2.62023	0
55814	2.61557	0	56161	2.59614	0		55235	2.64879	0	55692	2.62207	0
55834	2.61741	0	56181	2.59795	0		55255	2.65067	0	55712	2.62392	0
55854	2.61925	0	56201	2.59977	0		55275	2.65255	0	55732	2.62577	0
55874	2.62109	0	56221	2.60158	0		55295	2.65444	0	55752	2.62762	0
55894	2.62293	0	56241	2.6034	0		55315	2.65632	0	55772	2.62947	0
55914	2.62477	0	56261	2.60522	0		55335	2.6582	0	55792	2.63132	0
55934	2.62661	0	56281	2.60703	0		55355	2.66009	0	55812	2.63317	0
55954	2.62846	0	56301	2.60885	0		55375	2.66197	0	55832	2.63502	0
55974	2.6303	0	56321	2.61067	0		55395	2.66386	0	55852	2.63687	0
55994	2.63214	0	56341	2.61249	0		55415	2.66575	0	55872	2.63872	0
56014	2.63399	0	56361	2.61431	0		55435	2.66764	0	55892	2.64058	0
56034	2.63584	0	56381	2.61613	0		55455	2.66952	0	55912	2.64243	0
56054	2.63768	0	56401	2.61795	0		55475	2.67141	0	55932	2.64429	0
56074	2.63953	0	56421	2.61978	0		55495	2.6733	0	55952	2.64614	0
56094	2.64138	0	56441	2.6216	0		55515	2.67519	0	55972	2.648	0
56114	2.64323	0	56461	2.62342	0		55535	2.67708	0	55992	2.64986	0
56134	2.64507	0	56481	2.62525	0		55555	2.67898	0	56012	2.65171	0
56154	2.64692	0	56501	2.62707	0		55575	2.68087	0	56032	2.65357	0
56174	2.64877	0	56521	2.6289	0		55595	2.68276	1	56052	2.65543	0
56194	2.65062	0	56541	2.63072	0		55615	2.68465	0	56072	2.65729	0
56214	2.65248	0	56561	2.63255	0		55635	2.68655	0	56092	2.65915	0
56234	2.65433	0	56581	2.63438	0		55655	2.68844	0	56112	2.66101	0
56254	2.65618	0	56601	2.6362	0		55675	2.69034	0	56132	2.66287	0
56274	2.65803	0	56621	2.63803	0		55695	2.69224	0	56152	2.66473	0
56294	2.65989	0	56641	2.63986	0		55715	2.69413	0	56172	2.6666	0
56314	2.66174	0	56661	2.64169	0		55735	2.69603	0	56192	2.66846	0
56334	2.6636	0	56681	2.64352	0		55755	2.69793	0	56212	2.67032	0
56354	2.66546	0	56701	2.64535	0		55775	2.69983	0	56232	2.67219	0
56374	2.66731	0	56721	2.64719	0		55795	2.70173	0	56252	2.67405	0
56394	2.66917	0	56741	2.64902	0		55815	2.70363	0	56272	2.67592	0
56414	2.67103	0	56761	2.65085	0		55835	2.70553	0	56292	2.67779	0
56434	2.67289	0	56781	2.65268	0		55855	2.70743	0	56312	2.67965	0
56454	2.67475	0	56801	2.65452	0		55875	2.70933	0	56332	2.68152	0
56474	2.6766	0	56821	2.65635	0		55895	2.71124	0	56352	2.68339	0
56494	2.67847	0	56841	2.65819	0		55915	2.71314	0	56372	2.68526	0
56514	2.68033	0	56861	2.66003	0		55935	2.71504	0	56392	2.68713	0
56534	2.68219	0	56881	2.66186	0		55955	2.71695	0	56412	2.689	0
56554	2.68405	0	56901	2.6637	0		55975	2.71886	0	56432	2.69087	0
56574	2.68592	0	56921	2.66554	1		55995	2.72076	0	56452	2.69274	0
56594	2.68778	0	56941	2.66738	0		56015	2.72267	0	56472	2.69461	0
56614	2.68964	0	56961	2.66922	0		56035	2.72458	0	56492	2.69649	0
56634	2.69151	0	56981	2.67106	0		56055	2.72649	0	56512	2.69836	0
56654	2.69337	0	57001	2.6729	0		56075	2.72839	0	56532	2.70023	0
56674	2.69524	0	57021	2.67474	0		56095	2.7303	0	56552	2.70211	0
56694	2.69711	0	57041	2.67658	0		56115	2.73222	1	56572	2.70398	0
56714	2.69897	0	57061	2.67842	0		56135	2.73413	0	56592	2.70586	0
56734	2.70084	0	57081	2.68027	0		56155	2.73604	0	56612	2.70774	0
56754	2.70271	0	57101	2.68211	0		56175	2.73795	0	56632	2.70961	0
56774	2.70458	0	57121	2.68395	0		56195	2.73986	0	56652	2.71149	0
56794	2.70645	0	57141	2.6858	0		56215	2.74178	0	56672	2.71337	0
56814	2.70832	0	57161	2.68764	0		56235	2.74369	0	56692	2.71525	0
56834	2.7102	0	57181	2.68949	0		56255	2.74561	0	56712	2.71713	0
56854	2.71207	0	57201	2.69134	0		56275	2.74752	0	56732	2.71901	0
56874	2.71394	0	57221	2.69319	0		56295	2.74944	0	56752	2.72089	0
56894	2.71581	0	57241	2.69503	0		56315	2.75136	0	56772	2.72278	0
56914	2.71769	0	57261	2.69688	0		56335	2.75327	0	56792	2.72466	0
56934	2.71956	0	57281	2.69873	0		56355	2.75519	0	56812	2.72654	0
56954	2.72144	0	57301	2.70058	0		56375	2.75711	0	56832	2.72843	0
56974	2.72331	0	57321	2.70243	0		56395	2.75903	0	56852	2.73031	0
56994	2.72519	0	57341	2.70429	0		56415	2.76095	0	56872	2.7322	0
57014	2.72707	0	57361	2.70614	0		56435	2.76287	0	56892	2.73408	0
57034	2.72895	0	57381	2.70799	0		56455	2.76479	0	56912	2.73597	0
57054	2.73082	0	57401	2.70984	0		56475	2.76672	0	56932	2.73786	0
57074	2.73271	0	57421	2.7117	0		56495	2.76864	0	56952	2.73975	0
57094	2.73459	0	57441	2.71355	0		56515	2.77056	0	56972	2.74163	0
57114	2.73647	0	57461	2.71541	0		56535	2.77249	0	56992	2.74352	0
57134	2.73835	0	57481	2.71726	0		56555	2.77441	0	57012	2.74541	0
57154	2.74023	0	57501	2.71912	0		56575	2.77634	0	57032	2.7473	0
57174	2.74211	0	57521	2.72098	0		56595	2.77827	0	57052	2.74919	0
57194	2.74399	0	57541	2.72283	0		56615	2.78019	0	57072	2.75109	0
57214	2.74588	0	57561	2.72469	0		56635	2.78212	0	57092	2.75298	0
57234	2.74776	0	57581	2.72655	0		56655	2.78405	0	57112	2.75487	0
57254	2.74965	0	57601	2.72841	0		56675	2.78598	0	57132	2.75677	0
57274	2.75153	0	57621	2.73027	0		56695	2.78791	0	57152	2.75866	0
57294	2.75342	0	57641	2.73213	0		56715	2.78984	0	57172	2.76056	0
57314	2.75531	0	57661	2.73399	0		56735	2.79177	0	57192	2.76245	0
57334	2.75719	0	57681	2.73585	0		56755	2.7937	0	57212	2.76435	0
57354	2.75908	0	57701	2.73772	0		56775	2.79563	0	57232	2.76625	0
57374	2.76097	0	57721	2.73958	0		56795	2.79757	0	57252	2.76814	0
57394	2.76286	0	57741	2.74145	0		56815	2.7995	0	57272	2.77004	0
57414	2.76475	0	57761	2.74331	0		56835	2.80144	0	57292	2.77194	0
57434	2.76664	0	57781	2.74518	0		56855	2.80337	0	57312	2.77384	0
57454	2.76854	0	57801	2.74704	1		56875	2.80531	0	57332	2.77574	0
57474	2.77043	0	57821	2.74891	0		56895	2.80724	0	57352	2.77764	0
57494	2.77232	0	57841	2.75078	0		56915	2.80918	0	57372	2.77954	0
57514	2.77421	0	57861	2.75264	0		56935	2.81112	0	57392	2.78145	0
57534	2.77611	0	57881	2.75451	0		56955	2.81305	0	57412	2.78335	0
57554	2.778	0	57901	2.75638	0		56975	2.815	0	57432	2.78525	0
57574	2.7799	0	57921	2.75825	0		56995	2.81693	0	57452	2.78716	0
57594	2.78179	0	57941	2.76012	0		57015	2.81887	0	57472	2.78906	0
57614	2.78369	0	57961	2.76199	0		57035	2.82082	1	57492	2.79097	0
57634	2.78559	0	57981	2.76386	0		57055	2.82276	0	57512	2.79287	0
57654	2.78749	0	58001	2.76574	0		57075	2.8247	0	57532	2.79478	0
57674	2.78939	0	58021	2.76761	0		57095	2.82664	0	57552	2.79669	0
57694	2.79129	0	58041	2.76948	0		57115	2.82859	0	57572	2.7986	0
57714	2.79319	0	58061	2.77136	0		57135	2.83053	0	57592	2.8005	0
57734	2.79509	0	58081	2.77323	0		57155	2.83248	0	57612	2.80241	0
57754	2.79699	0	58101	2.77511	0		57175	2.83442	0	57632	2.80432	0
57774	2.79889	0	58121	2.77698	0		57195	2.83637	0	57652	2.80623	0
57794	2.80079	0	58141	2.77886	0		57215	2.83832	0	57672	2.80815	0
57814	2.8027	0	58161	2.78074	0		57235	2.84026	0	57692	2.81006	0
57834	2.8046	0	58181	2.78262	0		57255	2.84221	0	57712	2.81197	0
57854	2.8065	0	58201	2.7845	0		57275	2.84416	0	57732	2.81388	0
57874	2.80841	0	58221	2.78637	0		57295	2.84611	0	57752	2.8158	0
57894	2.81032	0	58241	2.78825	0		57315	2.84806	0	57772	2.81771	0
57914	2.81222	0	58261	2.79013	0		57335	2.85001	0	57792	2.81963	0
57934	2.81413	0	58281	2.79202	0		57355	2.85196	0	57812	2.82154	0
57954	2.81604	0	58301	2.7939	0		57375	2.85392	0	57832	2.82346	0
57974	2.81794	0	58321	2.79578	0		57395	2.85587	0	57852	2.82538	0
57994	2.81985	0	58341	2.79766	0		57415	2.85783	0	57872	2.82729	0
58014	2.82176	0	58361	2.79955	0		57435	2.85978	0	57892	2.82921	0
58034	2.82367	0	58381	2.80143	0		57455	2.86173	0	57912	2.83113	0
58054	2.82558	0	58401	2.80332	0		57475	2.86369	0	57932	2.83305	0
58074	2.8275	0	58421	2.8052	0		57495	2.86565	0	57952	2.83497	0
58094	2.82941	0	58441	2.80709	0		57515	2.8676	0	57972	2.8369	0
58114	2.83132	0	58461	2.80898	0		57535	2.86956	0	57992	2.83882	0
58134	2.83324	0	58481	2.81086	0		57555	2.87152	0	58012	2.84074	0
58154	2.83515	0	58501	2.81275	0		57575	2.87348	0	58032	2.84266	0
58174	2.83706	0	58521	2.81464	0		57595	2.87544	0	58052	2.84459	0
58194	2.83898	0	58541	2.81653	0		57615	2.8774	0	58072	2.84651	0
58214	2.8409	0	58561	2.81842	0		57635	2.87936	0	58092	2.84843	0
58234	2.84281	0	58581	2.82031	0		57655	2.88132	0	58112	2.85036	0
58254	2.84473	0	58601	2.8222	0		57675	2.88329	0	58132	2.85229	0
58274	2.84665	0	58621	2.82409	0		57695	2.88525	0	58152	2.85421	0
58294	2.84857	0	58641	2.82599	0		57715	2.88721	0	58172	2.85614	0
58314	2.85049	0	58661	2.82788	0		57735	2.88918	0	58192	2.85807	0
58334	2.85241	0	58681	2.82977	0		57755	2.89114	0	58212	2.86	0
58354	2.85433	0	58701	2.83167	0		57775	2.89311	0	58232	2.86193	0
58374	2.85625	0	58721	2.83356	0		57795	2.89507	0	58252	2.86386	0
58394	2.85817	0	58741	2.83546	0		57815	2.89704	0	58272	2.86579	0
58414	2.86009	0	58761	2.83736	0		57835	2.89901	0	58292	2.86772	0
58434	2.86202	0	58781	2.83925	0		57855	2.90098	1	58312	2.86965	0
58454	2.86394	0	58801	2.84115	0		57875	2.90295	0	58332	2.87159	0
58474	2.86587	0	58821	2.84305	0		57895	2.90492	0	58352	2.87352	0
58494	2.86779	0	58841	2.84495	0		57915	2.90689	0	58372	2.87546	0
58514	2.86972	0	58861	2.84685	0		57935	2.90886	0	58392	2.87739	0
58534	2.87164	1	58881	2.84875	0		57955	2.91083	0	58412	2.87933	0
58554	2.87357	0	58901	2.85065	0		57975	2.9128	0	58432	2.88126	0
58574	2.8755	0	58921	2.85255	0		57995	2.91478	0	58452	2.8832	0
58594	2.87743	0	58941	2.85445	0		58015	2.91675	0	58472	2.88514	0
58614	2.87936	1	58961	2.85635	0		58035	2.91872	0	58492	2.88707	0
58634	2.88129	0	58981	2.85826	0		58055	2.9207	0	58512	2.88901	0
58654	2.88322	0	59001	2.86016	1		58075	2.92268	0	58532	2.89095	0
58674	2.88515	0	59021	2.86207	0		58095	2.92465	0	58552	2.89289	0
58694	2.88708	0	59041	2.86397	0		58115	2.92663	0	58572	2.89483	0
58714	2.88901	0	59061	2.86588	0		58135	2.92861	0	58592	2.89677	0
58734	2.89094	0	59081	2.86778	0		58155	2.93059	0	58612	2.89872	0
58754	2.89288	0	59101	2.86969	0		58175	2.93257	0	58632	2.90066	0
58774	2.89481	0	59121	2.8716	0		58195	2.93455	0	58652	2.9026	0
58794	2.89675	0	59141	2.87351	0		58215	2.93653	0	58672	2.90455	0
58814	2.89868	0	59161	2.87542	0		58235	2.93851	0	58692	2.90649	0
58834	2.90062	0	59181	2.87733	0		58255	2.94049	0	58712	2.90843	0
58854	2.90256	0	59201	2.87924	0		58275	2.94247	0	58732	2.91038	0
58874	2.90449	0	59221	2.88115	0		58295	2.94446	0	58752	2.91233	0
58894	2.90643	0	59241	2.88306	0		58315	2.94644	0	58772	2.91427	0
58914	2.90837	0	59261	2.88497	0		58335	2.94842	0	58792	2.91622	0
58934	2.91031	0	59281	2.88688	0		58355	2.95041	0	58812	2.91817	0
58954	2.91225	0	59301	2.8888	0		58375	2.9524	0	58832	2.92012	0
58974	2.91419	0	59321	2.89071	0		58395	2.95438	0	58852	2.92207	0
58994	2.91613	0	59341	2.89263	0		58415	2.95637	0	58872	2.92402	0
59014	2.91807	0	59361	2.89454	0		58435	2.95836	0	58892	2.92597	0
59034	2.92002	0	59381	2.89646	0		58455	2.96034	0	58912	2.92792	0
59054	2.92196	0	59401	2.89837	0		58475	2.96233	0	58932	2.92988	0
59074	2.92391	0	59421	2.90029	0		58495	2.96432	0	58952	2.93183	0
59094	2.92585	0	59441	2.90221	0		58515	2.96631	1	58972	2.93378	0
59114	2.9278	0	59461	2.90413	0		58535	2.96831	0	58992	2.93574	0
59134	2.92974	0	59481	2.90605	0		58555	2.9703	0	59012	2.93769	0
59154	2.93169	0	59501	2.90797	0		58575	2.97229	0	59032	2.93965	0
59174	2.93364	0	59521	2.90989	0		58595	2.97428	0	59052	2.9416	0
59194	2.93558	0	59541	2.91181	0		58615	2.97628	0	59072	2.94356	0
59214	2.93753	0	59561	2.91373	0		58635	2.97827	0	59092	2.94552	0
59234	2.93948	0	59581	2.91565	0		58655	2.98027	0	59112	2.94748	0
59254	2.94143	0	59601	2.91758	0		58675	2.98226	0	59132	2.94944	0
59274	2.94338	0	59621	2.9195	0		58695	2.98426	0	59152	2.9514	0
59294	2.94533	0	59641	2.92142	0		58715	2.98626	0	59172	2.95336	0
59314	2.94728	0	59661	2.92335	0		58735	2.98826	0	59192	2.95532	0
59334	2.94924	0	59681	2.92528	0		58755	2.99025	0	59212	2.95728	0
59354	2.95119	0	59701	2.9272	0		58775	2.99225	0	59232	2.95924	0
59374	2.95314	0	59721	2.92913	0		58795	2.99425	1	59252	2.9612	0
59394	2.9551	0	59741	2.93106	0		58815	2.99625	0	59272	2.96317	0
59414	2.95705	0	59761	2.93298	0		58835	2.99825	0	59292	2.96513	0
59434	2.95901	0	59781	2.93491	0		58855	3.00026	0	59312	2.9671	0
59454	2.96096	0	59801	2.93684	0		58875	3.00226	0	59332	2.96906	0
59474	2.96292	0	59821	2.93877	0		58895	3.00426	0	59352	2.97103	0
59494	2.96488	0	59841	2.9407	0		58915	3.00627	0	59372	2.97299	0
59514	2.96684	0	59861	2.94263	0		58935	3.00827	0	59392	2.97496	0
59534	2.9688	0	59881	2.94456	0		58955	3.01028	0	59412	2.97693	0
59554	2.97076	0	59901	2.9465	0		58975	3.01228	0	59432	2.9789	0
59574	2.97272	0	59921	2.94843	0		58995	3.01429	0	59452	2.98087	0
59594	2.97468	0	59941	2.95037	0		59015	3.0163	0	59472	2.98284	0
59614	2.97664	0	59961	2.9523	0		59035	3.0183	1	59492	2.98481	0
59634	2.9786	0	59981	2.95424	0		59055	3.02031	0	59512	2.98678	0
59654	2.98056	0	60001	2.95617	0		59075	3.02232	0	59532	2.98875	0
59674	2.98253	0	60021	2.95811	0		59095	3.02433	1	59552	2.99072	0
59694	2.98449	0	60041	2.96004	0		59115	3.02634	0	59572	2.9927	0
59714	2.98645	0	60061	2.96198	0		59135	3.02835	0	59592	2.99467	0
59734	2.98842	0	60081	2.96392	0		59155	3.03037	0	59612	2.99665	0
59754	2.99039	0	60101	2.96586	0		59175	3.03238	0	59632	2.99862	0
59774	2.99235	0	60121	2.9678	0		59195	3.03439	0	59652	3.0006	0
59794	2.99432	0	60141	2.96974	0		59215	3.03641	0	59672	3.00257	0
59814	2.99629	0	60161	2.97168	0		59235	3.03842	0	59692	3.00455	0
59834	2.99826	0	60181	2.97362	0		59255	3.04044	0	59712	3.00653	0
59854	3.00023	0	60201	2.97556	0		59275	3.04245	0	59732	3.00851	0
59874	3.0022	0	60221	2.9775	0		59295	3.04447	0	59752	3.01049	0
59894	3.00417	0	60241	2.97945	0		59315	3.04649	0	59772	3.01247	0
59914	3.00614	0	60261	2.98139	0		59335	3.0485	0	59792	3.01444	0
59934	3.00811	0	60281	2.98334	0		59355	3.05052	0	59812	3.01643	0
59954	3.01008	0	60301	2.98528	0		59375	3.05254	0	59832	3.01841	1
59974	3.01206	0	60321	2.98723	0		59395	3.05456	0	59852	3.02039	0
59994	3.01403	0	60341	2.98917	0		59415	3.05658	0	59872	3.02237	59
60014	3.016	0	60361	2.99112	0		59435	3.0586	0	59892	3.02436	370
60034	3.01798	0	60381	2.99307	0		59455	3.06063	0	59912	3.02634	3
60054	3.01995	0	60401	2.99502	0		59475	3.06265	0	59932	3.02833	2
60074	3.02193	0	60421	2.99697	0		59495	3.06467	0	59952	3.03031	0
60094	3.02391	1	60441	2.99892	0		59515	3.0667	0	59972	3.0323	1
60114	3.02589	0	60461	3.00087	0		59535	3.06872	1	59992	3.03429	0
60134	3.02786	0	60481	3.00282	0		59555	3.07075	0	60012	3.03627	0
60154	3.02984	0	60501	3.00477	1		59575	3.07277	0	60032	3.03826	0
60174	3.03182	0	60521	3.00672	0		59595	3.0748	0	60052	3.04025	0
60194	3.0338	0	60541	3.00867	0		59615	3.07683	1	60072	3.04224	0
60214	3.03578	0	60561	3.01063	0		59635	3.07885	0	60092	3.04423	0
60234	3.03776	1	60581	3.01258	0		59655	3.08088	0	60112	3.04622	0
60254	3.03975	0	60601	3.01454	0		59675	3.08291	0	60132	3.04821	0
60274	3.04173	0	60621	3.01649	0		59695	3.08494	0	60152	3.0502	0
60294	3.04371	0	60641	3.01845	1		59715	3.08697	0	60172	3.0522	0
60314	3.0457	0	60661	3.0204	1		59735	3.089	0	60192	3.05419	0
60334	3.04768	0	60681	3.02236	332		59755	3.09104	0	60212	3.05618	0
60354	3.04967	0	60701	3.02432	192		59775	3.09307	0	60232	3.05818	0
60374	3.05165	0	60721	3.02628	1		59795	3.0951	0	60252	3.06017	0
60394	3.05364	0	60741	3.02824	1		59815	3.09714	0	60272	3.06217	0
60414	3.05563	0	60761	3.0302	1		59835	3.09917	0	60292	3.06417	0
60434	3.05762	0	60781	3.03216	0		59855	3.10121	0	60312	3.06616	0
60454	3.0596	0	60801	3.03412	0		59875	3.10324	0	60332	3.06816	0
60474	3.06159	0	60821	3.03608	0		59895	3.10528	0	60352	3.07016	0
60494	3.06358	0	60841	3.03804	0		59915	3.10732	0	60372	3.07216	0
60514	3.06557	0	60861	3.04001	0		59935	3.10935	1	60392	3.07416	0
60534	3.06756	0	60881	3.04197	1		59955	3.11139	0	60412	3.07616	0
60554	3.06956	0	60901	3.04393	1		59975	3.11343	0	60432	3.07816	0
60574	3.07155	0	60921	3.0459	2		59995	3.11547	0	60452	3.08016	0
60594	3.07354	0	60941	3.04786	0		60015	3.11751	0	60472	3.08216	0
60614	3.07553	0	60961	3.04983	0		60035	3.11956	0	60492	3.08417	0
60634	3.07753	0	60981	3.0518	0		60055	3.1216	0	60512	3.08617	0
60654	3.07952	0	61001	3.05376	0		60075	3.12364	0	60532	3.08818	0
60674	3.08152	0	61021	3.05573	0		60095	3.12568	0	60552	3.09018	0
60694	3.08352	0	61041	3.0577	0		60115	3.12773	0	60572	3.09219	0
60714	3.08551	0	61061	3.05967	0		60135	3.12977	0	60592	3.09419	0
60734	3.08751	1	61081	3.06164	0		60155	3.13182	0	60612	3.0962	0
60754	3.08951	0	61101	3.06361	0		60175	3.13386	0	60632	3.09821	1
60774	3.09151	0	61121	3.06558	0		60195	3.13591	0	60652	3.10022	0
60794	3.09351	0	61141	3.06755	0		60215	3.13796	0	60672	3.10223	0
60814	3.09551	1	61161	3.06953	0		60235	3.14	0	60692	3.10424	0
60834	3.09751	1	61181	3.0715	0		60255	3.14205	0	60712	3.10625	0
60854	3.09951	1	61201	3.07347	0		60275	3.1441	0	60732	3.10826	0
60874	3.10151	0	61221	3.07545	0		60295	3.14615	0	60752	3.11027	0
60894	3.10352	0	61241	3.07742	0		60315	3.1482	0	60772	3.11228	0
60914	3.10552	0	61261	3.0794	1		60335	3.15026	0	60792	3.11429	0
60934	3.10752	1	61281	3.08137	1		60355	3.15231	0	60812	3.11631	0
60954	3.10953	0	61301	3.08335	0		60375	3.15436	0	60832	3.11832	0
60974	3.11153	0	61321	3.08533	0		60395	3.15641	0	60852	3.12034	0
60994	3.11354	0	61341	3.08731	0		60415	3.15847	0	60872	3.12235	0
61014	3.11555	0	61361	3.08929	0		60435	3.16052	0	60892	3.12437	0
61034	3.11755	0	61381	3.09127	0		60455	3.16258	0	60912	3.12638	0
61054	3.11956	0	61401	3.09325	0		60475	3.16463	0	60932	3.1284	0
61074	3.12157	0	61421	3.09523	0		60495	3.16669	0	60952	3.13042	0
61094	3.12358	0	61441	3.09721	0		60515	3.16875	0	60972	3.13244	0
61114	3.12559	0	61461	3.09919	0		60535	3.17081	0	60992	3.13446	0
61134	3.1276	0	61481	3.10117	0		60555	3.17286	0	61012	3.13648	0
61154	3.12961	0	61501	3.10316	0		60575	3.17492	0	61032	3.1385	0
61174	3.13162	0	61521	3.10514	0		60595	3.17698	0	61052	3.14052	0
61194	3.13364	0	61541	3.10712	0		60615	3.17904	0	61072	3.14254	0
61214	3.13565	0	61561	3.10911	0		60635	3.18111	0	61092	3.14457	0
61234	3.13766	0	61581	3.1111	0		60655	3.18317	0	61112	3.14659	1
61254	3.13968	0	61601	3.11308	0		60675	3.18523	0	61132	3.14861	0
61274	3.14169	0	61621	3.11507	0		60695	3.1873	0	61152	3.15064	0
61294	3.14371	0	61641	3.11706	1		60715	3.18936	0	61172	3.15266	0
61314	3.14573	0	61661	3.11904	0		60735	3.19142	0	61192	3.15469	0
61334	3.14774	0	61681	3.12103	0		60755	3.19349	0	61212	3.15672	0
61354	3.14976	0	61701	3.12302	0		60775	3.19556	0	61232	3.15874	0
61374	3.15178	0	61721	3.12501	0		60795	3.19762	0	61252	3.16077	0
61394	3.1538	0	61741	3.12701	0		60815	3.19969	0	61272	3.1628	0
61414	3.15582	0	61761	3.129	0		60835	3.20176	0	61292	3.16483	0
61434	3.15784	1	61781	3.13099	0		60855	3.20383	0	61312	3.16686	0
61454	3.15986	0	61801	3.13298	0		60875	3.20589	0	61332	3.16889	0
61474	3.16188	0	61821	3.13497	0		60895	3.20797	0	61352	3.17092	0
61494	3.1639	0	61841	3.13697	0		60915	3.21004	0	61372	3.17295	0
61514	3.16593	0	61861	3.13896	0		60935	3.21211	0	61392	3.17498	0
61534	3.16795	0	61881	3.14096	0		60955	3.21418	0	61412	3.17702	0
61554	3.16997	0	61901	3.14295	1		60975	3.21625	0	61432	3.17905	0
61574	3.172	0	61921	3.14495	0		60995	3.21833	0	61452	3.18109	0
61594	3.17402	0	61941	3.14695	0		61015	3.2204	0	61472	3.18312	0
61614	3.17605	0	61961	3.14895	0		61035	3.22248	0	61492	3.18516	0
61634	3.17808	0	61981	3.15095	0		61055	3.22455	0	61512	3.18719	0
61654	3.1801	0	62001	3.15294	0		61075	3.22663	0	61532	3.18923	0
61674	3.18213	0	62021	3.15494	0		61095	3.2287	0	61552	3.19127	0
61694	3.18416	0	62041	3.15694	0		61115	3.23078	0	61572	3.19331	0
61714	3.18619	0	62061	3.15895	0		61135	3.23286	1	61592	3.19535	0
61734	3.18822	0	62081	3.16095	0		61155	3.23494	0	61612	3.19738	0
61754	3.19025	0	62101	3.16295	0		61175	3.23702	0	61632	3.19942	0
61774	3.19228	0	62121	3.16495	0		61195	3.2391	0	61652	3.20146	0
61794	3.19431	0	62141	3.16696	0		61215	3.24118	1	61672	3.20351	0
61814	3.19635	0	62161	3.16896	0		61235	3.24326	0	61692	3.20555	0
61834	3.19838	0	62181	3.17096	0		61255	3.24534	0	61712	3.20759	0
61854	3.20041	0	62201	3.17297	0		61275	3.24742	0	61732	3.20964	0
61874	3.20245	0	62221	3.17498	0		61295	3.24951	0	61752	3.21168	0
61894	3.20448	0	62241	3.17698	0		61315	3.25159	0	61772	3.21372	0
61914	3.20652	0	62261	3.17899	0		61335	3.25368	0	61792	3.21577	0
61934	3.20856	0	62281	3.181	0		61355	3.25576	0	61812	3.21782	0
61954	3.21059	0	62301	3.18301	0		61375	3.25785	0	61832	3.21986	0
61974	3.21263	0	62321	3.18502	0		61395	3.25994	0	61852	3.22191	0
61994	3.21467	0	62341	3.18703	0		61415	3.26202	0	61872	3.22396	0
62014	3.21671	0	62361	3.18904	0		61435	3.26411	0	61892	3.22601	0
62034	3.21875	0	62381	3.19105	0		61455	3.2662	0	61912	3.22806	0
62054	3.22079	0	62401	3.19306	1		61475	3.26829	0	61932	3.23011	0
62074	3.22283	0	62421	3.19507	0		61495	3.27038	0	61952	3.23216	0
62094	3.22487	0	62441	3.19708	0		61515	3.27247	0	61972	3.23421	0
62114	3.22691	0	62461	3.1991	0		61535	3.27456	0	61992	3.23626	0
62134	3.22896	0	62481	3.20111	0		61555	3.27665	0	62012	3.23831	0
62154	3.231	0	62501	3.20313	0		61575	3.27875	0	62032	3.24037	0
62174	3.23304	0	62521	3.20514	0		61595	3.28084	0	62052	3.24242	0
62194	3.23509	0	62541	3.20716	0		61615	3.28293	0	62072	3.24447	0
62214	3.23713	0	62561	3.20918	1		61635	3.28503	0	62092	3.24653	0
62234	3.23918	0	62581	3.21119	0		61655	3.28712	0	62112	3.24859	0
62254	3.24123	0	62601	3.21321	0		61675	3.28922	0	62132	3.25064	0
62274	3.24327	0	62621	3.21523	0		61695	3.29132	0	62152	3.2527	0
62294	3.24532	0	62641	3.21725	0		61715	3.29341	0	62172	3.25476	0
62314	3.24737	0	62661	3.21927	0		61735	3.29551	0	62192	3.25682	0
62334	3.24942	0	62681	3.22129	0		61755	3.29761	0	62212	3.25888	0
62354	3.25147	0	62701	3.22331	0		61775	3.29971	0	62232	3.26093	0
62374	3.25352	0	62721	3.22533	0		61795	3.30181	0	62252	3.263	0
62394	3.25557	0	62741	3.22736	0		61815	3.30391	0	62272	3.26506	0
62414	3.25762	0	62761	3.22938	0		61835	3.30601	0	62292	3.26712	0
62434	3.25968	0	62781	3.2314	0		61855	3.30812	0	62312	3.26918	0
62454	3.26173	0	62801	3.23343	0		61875	3.31022	0	62332	3.27124	0
62474	3.26378	0	62821	3.23545	0		61895	3.31232	0	62352	3.27331	0
62494	3.26584	0	62841	3.23748	0		61915	3.31443	0	62372	3.27537	0
62514	3.26789	0	62861	3.2395	0		61935	3.31653	0	62392	3.27744	0
62534	3.26995	0	62881	3.24153	0		61955	3.31864	0	62412	3.2795	0
62554	3.27201	0	62901	3.24356	0		61975	3.32074	0	62432	3.28157	0
62574	3.27406	0	62921	3.24559	0		61995	3.32285	0	62452	3.28363	0
62594	3.27612	0	62941	3.24762	0		62015	3.32496	0	62472	3.2857	0
62614	3.27818	0	62961	3.24965	0		62035	3.32707	0	62492	3.28777	0
62634	3.28024	0	62981	3.25168	0		62055	3.32917	0	62512	3.28984	0
62654	3.2823	1	63001	3.25371	0		62075	3.33128	0	62532	3.29191	0
62674	3.28436	0	63021	3.25574	0		62095	3.33339	0	62552	3.29398	0
62694	3.28642	0	63041	3.25777	0		62115	3.3355	0	62572	3.29605	0
62714	3.28848	0	63061	3.2598	0		62135	3.33762	0	62592	3.29812	0
62734	3.29054	0	63081	3.26184	0		62155	3.33973	0	62612	3.30019	0
62754	3.29261	0	63101	3.26387	0		62175	3.34184	0	62632	3.30227	0
62774	3.29467	0	63121	3.26591	0		62195	3.34395	0	62652	3.30434	0
62794	3.29673	0	63141	3.26794	0		62215	3.34607	0	62672	3.30641	0
62814	3.2988	0	63161	3.26998	0		62235	3.34818	0	62692	3.30849	0
62834	3.30086	0	63181	3.27201	0		62255	3.3503	0	62712	3.31056	0
62854	3.30293	0	63201	3.27405	0		62275	3.35242	0	62732	3.31264	0
62874	3.305	0	63221	3.27609	0		62295	3.35453	0	62752	3.31472	0
62894	3.30707	0	63241	3.27813	0		62315	3.35665	0	62772	3.31679	0
62914	3.30913	0	63261	3.28017	0		62335	3.35877	0	62792	3.31887	0
62934	3.3112	0	63281	3.28221	0		62355	3.36089	0	62812	3.32095	0
62954	3.31327	0	63301	3.28425	0		62375	3.36301	0	62832	3.32303	0
62974	3.31534	0	63321	3.28629	0		62395	3.36513	0	62852	3.32511	0
62994	3.31741	0	63341	3.28833	0		62415	3.36725	0	62872	3.32719	0
63014	3.31948	1	63361	3.29037	0		62435	3.36937	0	62892	3.32927	0
63034	3.32156	0	63381	3.29241	0		62455	3.37149	0	62912	3.33135	0
63054	3.32363	0	63401	3.29446	0		62475	3.37361	0	62932	3.33344	0
63074	3.3257	0	63421	3.2965	0		62495	3.37574	0	62952	3.33552	0
63094	3.32777	0	63441	3.29855	0		62515	3.37786	0	62972	3.3376	0
63114	3.32985	0	63461	3.30059	0		62535	3.37999	0	62992	3.33969	0
63134	3.33193	0	63481	3.30264	0		62555	3.38211	0	63012	3.34177	0
63154	3.334	0	63501	3.30468	0		62575	3.38424	0	63032	3.34386	0
63174	3.33608	0	63521	3.30673	0		62595	3.38637	0	63052	3.34595	0
63194	3.33815	0	63541	3.30878	0		62615	3.38849	0	63072	3.34803	0
63214	3.34023	0	63561	3.31083	0		62635	3.39062	0	63092	3.35012	0
63234	3.34231	0	63581	3.31288	0		62655	3.39275	0	63112	3.35221	0
63254	3.34439	0	63601	3.31493	0		62675	3.39488	0	63132	3.3543	0
63274	3.34647	0	63621	3.31698	0		62695	3.39701	0	63152	3.35639	0
63294	3.34855	0	63641	3.31903	0		62715	3.39914	1	63172	3.35848	0
63314	3.35063	0	63661	3.32108	0		62735	3.40127	0	63192	3.36057	0
63334	3.35271	0	63681	3.32313	0		62755	3.4034	0	63212	3.36266	0
63354	3.3548	0	63701	3.32519	0		62775	3.40554	0	63232	3.36475	0
63374	3.35688	0	63721	3.32724	0		62795	3.40767	0	63252	3.36685	0
63394	3.35896	0	63741	3.32929	0		62815	3.40981	0	63272	3.36894	0
63414	3.36105	0	63761	3.33135	0		62835	3.41194	0	63292	3.37103	0
63434	3.36313	0	63781	3.3334	0		62855	3.41408	0	63312	3.37313	0
63454	3.36522	0	63801	3.33546	0		62875	3.41621	0	63332	3.37522	0
63474	3.3673	0	63821	3.33752	0		62895	3.41835	0	63352	3.37732	0
63494	3.36939	0	63841	3.33957	0		62915	3.42049	0	63372	3.37942	0
63514	3.37148	0	63861	3.34163	0		62935	3.42263	0	63392	3.38151	0
63534	3.37357	0	63881	3.34369	0		62955	3.42476	0	63412	3.38361	0
63554	3.37565	0	63901	3.34575	0		62975	3.4269	0	63432	3.38571	0
63574	3.37774	0	63921	3.34781	0		62995	3.42904	0	63452	3.38781	0
63594	3.37983	0	63941	3.34987	0		63015	3.43119	0	63472	3.38991	0
63614	3.38192	0	63961	3.35193	0		63035	3.43333	0	63492	3.39201	0
63634	3.38402	0	63981	3.35399	0		63055	3.43547	0	63512	3.39411	0
63654	3.38611	0	64001	3.35606	0		63075	3.43761	0	63532	3.39622	0
63674	3.3882	0	64021	3.35812	0		63095	3.43975	0	63552	3.39832	0
63694	3.39029	0	64041	3.36018	0		63115	3.4419	0	63572	3.40042	0
63714	3.39239	0	64061	3.36225	0		63135	3.44404	0	63592	3.40253	0
63734	3.39448	0	64081	3.36431	0		63155	3.44619	0	63612	3.40463	0
63754	3.39658	0	64101	3.36638	0		63175	3.44834	0	63632	3.40674	0
63774	3.39867	0	64121	3.36844	0		63195	3.45048	0	63652	3.40884	0
63794	3.40077	0	64141	3.37051	0		63215	3.45263	0	63672	3.41095	0
63814	3.40287	0	64161	3.37258	0		63235	3.45478	0	63692	3.41306	0
63834	3.40496	0	64181	3.37465	0		63255	3.45693	0	63712	3.41516	0
63854	3.40706	0	64201	3.37672	0		63275	3.45908	0	63732	3.41727	0
63874	3.40916	0	64221	3.37879	0		63295	3.46123	0	63752	3.41938	0
63894	3.41126	0	64241	3.38086	0		63315	3.46338	0	63772	3.42149	0
63914	3.41336	0	64261	3.38293	0		63335	3.46553	0	63792	3.4236	0
63934	3.41546	0	64281	3.385	0		63355	3.46768	0	63812	3.42571	0
63954	3.41757	0	64301	3.38707	0		63375	3.46983	0	63832	3.42782	0
63974	3.41967	0	64321	3.38914	0		63395	3.47199	0	63852	3.42994	0
63994	3.42177	0	64341	3.39122	0		63415	3.47414	0	63872	3.43205	0
64014	3.42387	0	64361	3.39329	0		63435	3.4763	0	63892	3.43417	0
64034	3.42598	0	64381	3.39536	0		63455	3.47845	0	63912	3.43628	0
64054	3.42808	0	64401	3.39744	0		63475	3.48061	0	63932	3.43839	0
64074	3.43019	0	64421	3.39952	0		63495	3.48277	0	63952	3.44051	0
64094	3.4323	0	64441	3.40159	0		63515	3.48493	0	63972	3.44263	0
64114	3.4344	0	64461	3.40367	0		63535	3.48708	0	63992	3.44474	0
64134	3.43651	0	64481	3.40575	0		63555	3.48924	0	64012	3.44686	0
64154	3.43862	0	64501	3.40783	0		63575	3.4914	0	64032	3.44898	0
64174	3.44073	0	64521	3.40991	0		63595	3.49356	0	64052	3.4511	0
64194	3.44284	0	64541	3.41198	0		63615	3.49572	0	64072	3.45322	0
64214	3.44495	0	64561	3.41406	0		63635	3.49788	0	64092	3.45534	0
64234	3.44706	0	64581	3.41615	0		63655	3.50005	0	64112	3.45746	0
64254	3.44917	0	64601	3.41823	0		63675	3.50221	0	64132	3.45958	0
64274	3.45128	0	64621	3.42031	0		63695	3.50437	0	64152	3.4617	0
64294	3.45339	0	64641	3.42239	0		63715	3.50654	0	64172	3.46383	0
64314	3.45551	0	64661	3.42448	0		63735	3.5087	0	64192	3.46595	0
64334	3.45762	0	64681	3.42656	0		63755	3.51087	0	64212	3.46807	0
64354	3.45974	0	64701	3.42864	0		63775	3.51303	0	64232	3.4702	0
64374	3.46185	0	64721	3.43073	0		63795	3.5152	0	64252	3.47232	0
64394	3.46397	0	64741	3.43282	0		63815	3.51737	0	64272	3.47445	0
64414	3.46609	0	64761	3.4349	0		63835	3.51954	0	64292	3.47658	0
64434	3.4682	0	64781	3.43699	0		63855	3.52171	0	64312	3.4787	0
64454	3.47032	0	64801	3.43908	0		63875	3.52388	0	64332	3.48083	0
64474	3.47244	0	64821	3.44117	0		63895	3.52605	0	64352	3.48296	0
64494	3.47456	0	64841	3.44326	0		63915	3.52822	0	64372	3.48509	0
64514	3.47668	0	64861	3.44534	0		63935	3.53039	0	64392	3.48722	0
64534	3.4788	0	64881	3.44744	0		63955	3.53256	0	64412	3.48935	0
64554	3.48092	0	64901	3.44953	1		63975	3.53473	0	64432	3.49148	0
64574	3.48304	0	64921	3.45162	0		63995	3.53691	0	64452	3.49362	0
64594	3.48516	0	64941	3.45371	0		64015	3.53908	0	64472	3.49575	0
64614	3.48729	0	64961	3.4558	0		64035	3.54126	0	64492	3.49788	0
64634	3.48941	0	64981	3.4579	0		64055	3.54343	0	64512	3.50001	0
64654	3.49153	0	65001	3.45999	0		64075	3.54561	0	64532	3.50215	0
64674	3.49366	0	65021	3.46209	0		64095	3.54779	0	64552	3.50428	0
64694	3.49579	0	65041	3.46418	0		64115	3.54996	0	64572	3.50642	0
64714	3.49791	0	65061	3.46628	0		64135	3.55214	0	64592	3.50856	0
64734	3.50004	0	65081	3.46837	0		64155	3.55432	0	64612	3.51069	0
64754	3.50217	0	65101	3.47047	1		64175	3.5565	0	64632	3.51283	0
64774	3.50429	0	65121	3.47257	0		64195	3.55868	0	64652	3.51497	0
64794	3.50642	0	65141	3.47467	0		64215	3.56086	0	64672	3.51711	0
64814	3.50855	0	65161	3.47677	0		64235	3.56304	0	64692	3.51925	0
64834	3.51068	0	65181	3.47887	0		64255	3.56523	0	64712	3.52139	0
64854	3.51281	0	65201	3.48097	0		64275	3.56741	0	64732	3.52353	0
64874	3.51494	0	65221	3.48307	0		64295	3.56959	0	64752	3.52567	1
64894	3.51708	0	65241	3.48517	0		64315	3.57178	0	64772	3.52781	0
64914	3.51921	0	65261	3.48727	0		64335	3.57396	0	64792	3.52996	0
64934	3.52134	0	65281	3.48938	0		64355	3.57615	1	64812	3.5321	0
64954	3.52348	0	65301	3.49148	0		64375	3.57833	0	64832	3.53425	0
64974	3.52561	0	65321	3.49358	0		64395	3.58052	0	64852	3.53639	0
64994	3.52775	0	65341	3.49569	0		64415	3.58271	0	64872	3.53854	0
65014	3.52988	0	65361	3.49779	0		64435	3.5849	0	64892	3.54068	0
65034	3.53202	0	65381	3.4999	0		64455	3.58709	0	64912	3.54283	0
65054	3.53416	0	65401	3.50201	0		64475	3.58928	0	64932	3.54498	0
65074	3.5363	0	65421	3.50412	0		64495	3.59147	0	64952	3.54713	0
65094	3.53843	0	65441	3.50622	0		64515	3.59366	0	64972	3.54928	0
65114	3.54057	0	65461	3.50833	0		64535	3.59585	0	64992	3.55143	0
65134	3.54271	0	65481	3.51044	0		64555	3.59804	0	65012	3.55357	0
65154	3.54485	0	65501	3.51255	0		64575	3.60024	0	65032	3.55573	0
65174	3.54699	0	65521	3.51466	0		64595	3.60243	0	65052	3.55788	0
65194	3.54914	0	65541	3.51677	0		64615	3.60462	0	65072	3.56003	0
65214	3.55128	0	65561	3.51889	0		64635	3.60682	0	65092	3.56218	0
65234	3.55342	0	65581	3.521	0		64655	3.60901	0	65112	3.56434	0
65254	3.55557	0	65601	3.52311	0		64675	3.61121	0	65132	3.56649	0
65274	3.55771	0	65621	3.52523	0		64695	3.61341	0	65152	3.56865	0
65294	3.55986	0	65641	3.52734	0		64715	3.6156	0	65172	3.5708	0
65314	3.562	0	65661	3.52946	0		64735	3.6178	0	65192	3.57296	0
65334	3.56415	0	65681	3.53157	0		64755	3.62	0	65212	3.57511	0
65354	3.5663	0	65701	3.53369	0		64775	3.6222	0	65232	3.57727	0
65374	3.56844	0	65721	3.5358	0		64795	3.6244	0	65252	3.57943	0
65394	3.57059	0	65741	3.53792	0		64815	3.6266	0	65272	3.58159	0
65414	3.57274	0	65761	3.54004	0		64835	3.6288	0	65292	3.58375	0
65434	3.57489	0	65781	3.54216	0		64855	3.63101	0	65312	3.58591	0
65454	3.57704	0	65801	3.54428	0		64875	3.63321	0	65332	3.58807	0
65474	3.57919	0	65821	3.5464	0		64895	3.63541	0	65352	3.59023	0
65494	3.58134	0	65841	3.54852	0		64915	3.63762	0	65372	3.59239	0
65514	3.58349	0	65861	3.55064	0		64935	3.63982	0	65392	3.59455	0
65534	3.58565	0	65881	3.55276	0		64955	3.64203	0	65412	3.59672	0
65554	3.5878	0	65901	3.55489	0		64975	3.64424	0	65432	3.59888	0
65574	3.58995	0	65921	3.55701	0		64995	3.64644	0	65452	3.60105	0
65594	3.59211	0	65941	3.55913	0		65015	3.64865	0	65472	3.60321	0
65614	3.59427	0	65961	3.56126	0		65035	3.65086	0	65492	3.60538	0
65634	3.59642	0	65981	3.56338	0		65055	3.65307	0	65512	3.60754	0
65654	3.59858	0	66001	3.56551	0		65075	3.65528	0	65532	3.60971	0
65674	3.60073	0	66021	3.56764	0		65095	3.65749	0	65552	3.61188	0
65694	3.60289	0	66041	3.56976	0		65115	3.6597	0	65572	3.61405	1
65714	3.60505	0	66061	3.57189	0		65135	3.66191	0	65592	3.61621	0
65734	3.60721	0	66081	3.57402	0		65155	3.66412	0	65612	3.61838	0
65754	3.60937	0	66101	3.57615	0		65175	3.66634	0	65632	3.62055	0
65774	3.61153	0	66121	3.57828	0		65195	3.66855	0	65652	3.62273	0
65794	3.61369	0	66141	3.58041	0		65215	3.67076	0	65672	3.6249	0
65814	3.61585	0	66161	3.58254	0		65235	3.67298	0	65692	3.62707	0
65834	3.61802	0	66181	3.58467	0		65255	3.67519	0	65712	3.62924	0
65854	3.62018	0	66201	3.5868	0		65275	3.67741	1	65732	3.63142	0
65874	3.62234	0	66221	3.58894	0		65295	3.67963	0	65752	3.63359	0
65894	3.62451	0	66241	3.59107	0		65315	3.68185	0	65772	3.63577	0
65914	3.62667	0	66261	3.5932	0		65335	3.68406	0	65792	3.63794	0
65934	3.62884	0	66281	3.59534	0		65355	3.68628	0	65812	3.64012	0
65954	3.63101	0	66301	3.59747	0		65375	3.6885	0	65832	3.64229	0
65974	3.63317	0	66321	3.59961	0		65395	3.69072	1	65852	3.64447	0
65994	3.63534	0	66341	3.60175	0		65415	3.69294	0	65872	3.64665	0
66014	3.63751	0	66361	3.60388	0		65435	3.69517	2	65892	3.64883	0
66034	3.63968	0	66381	3.60602	0		65455	3.69739	0	65912	3.65101	0
66054	3.64185	0	66401	3.60816	0		65475	3.69961	0	65932	3.65319	0
66074	3.64402	0	66421	3.6103	0		65495	3.70184	1	65952	3.65537	0
66094	3.64619	0	66441	3.61244	0		65515	3.70406	0	65972	3.65755	0
66114	3.64836	0	66461	3.61458	0		65535	3.70629	3	65992	3.65973	0
66134	3.65053	0	66481	3.61672	0		65555	3.70851	1	66012	3.66192	1
66154	3.65271	0	66501	3.61886	0		65575	3.71074	0	66032	3.6641	0
66174	3.65488	0	66521	3.62101	1		65595	3.71297	3	66052	3.66628	0
66194	3.65705	0	66541	3.62315	0		65615	3.71519	0	66072	3.66847	0
66214	3.65923	0	66561	3.62529	0		65635	3.71742	0	66092	3.67065	0
66234	3.6614	0	66581	3.62744	0		65655	3.71965	0	66112	3.67284	0
66254	3.66358	0	66601	3.62958	0		65675	3.72188	0	66132	3.67503	0
66274	3.66576	0	66621	3.63173	0		65695	3.72411	0	66152	3.67721	0
66294	3.66793	0	66641	3.63387	0		65715	3.72634	0	66172	3.6794	0
66314	3.67011	0	66661	3.63602	0		65735	3.72857	0	66192	3.68159	0
66334	3.67229	0	66681	3.63817	0		65755	3.73081	0	66212	3.68378	0
66354	3.67447	0	66701	3.64032	0		65775	3.73304	0	66232	3.68597	0
66374	3.67665	0	66721	3.64246	0		65795	3.73527	0	66252	3.68816	0
66394	3.67883	0	66741	3.64461	0		65815	3.73751	0	66272	3.69035	0
66414	3.68101	0	66761	3.64676	0		65835	3.73974	0	66292	3.69254	0
66434	3.68319	0	66781	3.64891	0		65855	3.74198	0	66312	3.69474	0
66454	3.68538	0	66801	3.65107	0		65875	3.74422	0	66332	3.69693	0
66474	3.68756	0	66821	3.65322	0		65895	3.74645	0	66352	3.69912	0
66494	3.68974	0	66841	3.65537	0		65915	3.74869	0	66372	3.70132	0
66514	3.69193	0	66861	3.65752	0		65935	3.75093	0	66392	3.70351	0
66534	3.69411	0	66881	3.65968	0		65955	3.75317	0	66412	3.70571	0
66554	3.6963	0	66901	3.66183	0		65975	3.75541	0	66432	3.7079	0
66574	3.69848	0	66921	3.66399	0		65995	3.75765	0	66452	3.7101	0
66594	3.70067	1	66941	3.66614	0		66015	3.75989	0	66472	3.7123	0
66614	3.70286	0	66961	3.6683	0		66035	3.76213	0	66492	3.7145	0
66634	3.70505	0	66981	3.67046	0		66055	3.76437	0	66512	3.7167	0
66654	3.70724	0	67001	3.67261	0		66075	3.76662	0	66532	3.7189	0
66674	3.70943	2	67021	3.67477	0		66095	3.76886	0	66552	3.7211	0
66694	3.71162	0	67041	3.67693	0		66115	3.7711	0	66572	3.7233	0
66714	3.71381	0	67061	3.67909	0		66135	3.77335	0	66592	3.7255	0
66734	3.716	0	67081	3.68125	0		66155	3.7756	0	66612	3.7277	0
66754	3.71819	0	67101	3.68341	0		66175	3.77784	0	66632	3.72991	0
66774	3.72038	0	67121	3.68557	0		66195	3.78009	0	66652	3.73211	0
66794	3.72258	1	67141	3.68773	0		66215	3.78234	0	66672	3.73431	0
66814	3.72477	0	67161	3.6899	0		66235	3.78458	0	66692	3.73652	0
66834	3.72697	0	67181	3.69206	0		66255	3.78683	0	66712	3.73872	0
66854	3.72916	1	67201	3.69422	0		66275	3.78908	0	66732	3.74093	0
66874	3.73136	0	67221	3.69639	0		66295	3.79134	0	66752	3.74314	0
66878	3.7318	0	67225	3.69682	0		66299	3.79178	0	66756	3.74358	0
66898	3.73399	0	67245	3.69899	0		66319	3.79404	0	66776	3.74579	0
66918	3.73619	0	67265	3.70115	0		66339	3.79629	1	66796	3.74799	0
66938	3.73839	0	67285	3.70332	0		66359	3.79854	0	66816	3.7502	0
66958	3.74059	0	67305	3.70549	0		66379	3.80079	0	66836	3.75241	0
66978	3.74279	0	67325	3.70765	0		66399	3.80305	0	66856	3.75462	0
66998	3.74499	1	67345	3.70982	0		66419	3.8053	0	66876	3.75683	0
67018	3.74719	0	67365	3.71199	0		66439	3.80756	0	66896	3.75904	0
67038	3.74939	1	67385	3.71416	0		66459	3.80981	0	66916	3.76126	0
67058	3.75159	0	67405	3.71633	0		66479	3.81207	0	66936	3.76347	0
67078	3.7538	0	67425	3.7185	0		66499	3.81433	0	66956	3.76568	0
67098	3.756	0	67445	3.72067	0		66519	3.81659	0	66976	3.7679	0
67118	3.7582	0	67465	3.72285	0		66539	3.81885	0	66996	3.77011	0
67138	3.76041	0	67485	3.72502	0		66559	3.8211	0	67016	3.77233	0
67158	3.76261	0	67505	3.72719	0		66579	3.82336	0	67036	3.77454	0
67178	3.76482	0	67525	3.72937	0		66599	3.82563	0	67056	3.77676	0
67198	3.76703	0	67545	3.73154	0		66619	3.82789	0	67076	3.77898	0
67218	3.76923	0	67565	3.73372	0		66639	3.83015	0	67096	3.7812	0
67238	3.77144	0	67585	3.7359	1		66659	3.83241	0	67116	3.78341	0
67258	3.77365	0	67605	3.73807	0		66679	3.83467	0	67136	3.78563	0
67278	3.77586	0	67625	3.74025	0		66699	3.83694	0	67156	3.78785	0
67298	3.77807	0	67645	3.74243	0		66719	3.8392	0	67176	3.79007	0
67318	3.78028	0	67665	3.74461	0		66739	3.84147	0	67196	3.7923	0
67338	3.78249	0	67685	3.74679	0		66759	3.84373	0	67216	3.79452	0
67358	3.7847	0	67705	3.74897	0		66779	3.846	0	67236	3.79674	0
67378	3.78691	0	67725	3.75115	0		66799	3.84827	0	67256	3.79896	0
67398	3.78913	0	67745	3.75333	0		66819	3.85054	0	67276	3.80119	0
67418	3.79134	0	67765	3.75551	0		66839	3.85281	0	67296	3.80341	0
67438	3.79356	0	67785	3.75769	0		66859	3.85507	0	67316	3.80564	0
67458	3.79577	0	67805	3.75987	0		66879	3.85734	0	67336	3.80786	0
67478	3.79799	0	67825	3.76206	0		66899	3.85961	0	67356	3.81009	0
67498	3.8002	0	67845	3.76424	0		66919	3.86189	0	67376	3.81232	0
67518	3.80242	0	67865	3.76643	0		66939	3.86416	0	67396	3.81454	0
67538	3.80464	0	67885	3.76861	0		66959	3.86643	0	67416	3.81677	0
67558	3.80686	0	67905	3.7708	0		66979	3.8687	0	67436	3.819	0
67578	3.80907	0	67925	3.77299	0		66999	3.87098	0	67456	3.82123	0
67598	3.81129	0	67945	3.77517	0		67019	3.87325	0	67476	3.82346	0
67618	3.81351	0	67965	3.77736	0		67039	3.87553	0	67496	3.82569	0
67638	3.81573	0	67985	3.77955	0		67059	3.8778	0	67516	3.82793	0
67658	3.81796	0	68005	3.78174	0		67079	3.88008	0	67536	3.83016	0
67678	3.82018	0	68025	3.78393	1		67099	3.88236	0	67556	3.83239	0
67698	3.8224	0	68045	3.78612	0		67119	3.88464	0	67576	3.83462	0
67718	3.82462	0	68065	3.78831	0		67139	3.88692	0	67596	3.83686	0
67738	3.82685	0	68085	3.7905	0		67159	3.88919	0	67616	3.83909	0
67758	3.82907	0	68105	3.7927	0		67179	3.89147	0	67636	3.84133	0
67778	3.8313	0	68125	3.79489	0		67199	3.89376	0	67656	3.84356	0
67798	3.83352	0	68145	3.79708	0		67219	3.89604	0	67676	3.8458	0
67818	3.83575	0	68165	3.79928	0		67239	3.89832	0	67696	3.84804	0
67838	3.83798	0	68185	3.80147	0		67259	3.9006	0	67716	3.85028	0
67858	3.84021	0	68205	3.80367	0		67279	3.90288	0	67736	3.85252	0
67878	3.84244	0	68225	3.80586	0		67299	3.90517	0	67756	3.85476	0
67898	3.84466	0	68245	3.80806	0		67319	3.90745	0	67776	3.857	0
67918	3.84689	0	68265	3.81026	0		67339	3.90974	0	67796	3.85924	0
67938	3.84912	0	68285	3.81246	0		67359	3.91202	0	67816	3.86148	0
67958	3.85135	0	68305	3.81466	0		67379	3.91431	0	67836	3.86372	0
67978	3.85359	0	68325	3.81686	0		67399	3.9166	0	67856	3.86596	0
67998	3.85582	0	68345	3.81906	0		67419	3.91889	0	67876	3.86821	0
68018	3.85805	0	68365	3.82126	0		67439	3.92117	0	67896	3.87045	0
68038	3.86029	0	68385	3.82346	0		67459	3.92347	0	67916	3.8727	0
68058	3.86252	0	68405	3.82566	0		67479	3.92576	0	67936	3.87494	0
68078	3.86476	0	68425	3.82786	0		67499	3.92805	0	67956	3.87719	0
68098	3.86699	0	68445	3.83007	0		67519	3.93034	0	67976	3.87943	0
68118	3.86923	0	68465	3.83227	0		67539	3.93263	0	67996	3.88168	0
68138	3.87147	0	68485	3.83448	0		67559	3.93492	0	68016	3.88393	0
68158	3.8737	0	68505	3.83668	0		67579	3.93722	0	68036	3.88618	0
68178	3.87594	0	68525	3.83889	0		67599	3.93951	0	68056	3.88843	0
68198	3.87818	0	68545	3.84109	0		67619	3.9418	0	68076	3.89068	0
68218	3.88042	0	68565	3.8433	0		67639	3.9441	0	68096	3.89293	0
68238	3.88266	0	68585	3.84551	0		67659	3.94639	0	68116	3.89518	0
68258	3.8849	0	68605	3.84772	0		67679	3.94869	0	68136	3.89743	0
68278	3.88714	0	68625	3.84993	0		67699	3.95099	0	68156	3.89968	0
68298	3.88938	0	68645	3.85214	0		67719	3.95329	0	68176	3.90194	0
68318	3.89163	0	68665	3.85435	0		67739	3.95559	0	68196	3.90419	0
68338	3.89387	0	68685	3.85656	0		67759	3.95789	0	68216	3.90644	0
68358	3.89611	0	68705	3.85877	0		67779	3.96019	0	68236	3.9087	0
68378	3.89836	0	68725	3.86098	0		67799	3.96249	0	68256	3.91095	0
68398	3.90061	0	68745	3.8632	0		67819	3.96479	0	68276	3.91321	0
68418	3.90285	0	68765	3.86541	0		67839	3.96709	0	68296	3.91547	0
68438	3.9051	0	68785	3.86762	0		67859	3.96939	0	68316	3.91773	0
68458	3.90734	0	68805	3.86984	0		67879	3.9717	0	68336	3.91999	0
68478	3.90959	0	68825	3.87205	0		67899	3.974	0	68356	3.92224	0
68498	3.91184	0	68845	3.87427	0		67919	3.9763	0	68376	3.9245	0
68518	3.91409	0	68865	3.87649	0		67939	3.97861	0	68396	3.92676	0
68538	3.91634	0	68885	3.8787	0		67959	3.98092	0	68416	3.92903	0
68558	3.91859	0	68905	3.88092	0		67979	3.98322	0	68436	3.93129	0
68578	3.92084	0	68925	3.88314	0		67999	3.98553	0	68456	3.93355	0
68598	3.92309	0	68945	3.88536	0		68019	3.98784	0	68476	3.93581	0
68618	3.92535	0	68965	3.88758	0		68039	3.99015	0	68496	3.93807	0
68638	3.9276	0	68985	3.8898	0		68059	3.99246	0	68516	3.94034	0
68658	3.92985	0	69005	3.89202	0		68079	3.99477	0	68536	3.9426	0
68678	3.93211	0	69025	3.89424	0		68099	3.99708	0	68556	3.94487	0
68698	3.93436	0	69045	3.89646	0		68119	3.99939	0	68576	3.94714	0
68718	3.93662	0	69065	3.89869	0		68139	4.0017	0	68596	3.9494	0
68738	3.93887	0	69085	3.90091	0		68159	4.00401	0	68616	3.95167	0
68758	3.94113	0	69105	3.90313	0		68179	4.00633	0	68636	3.95394	0
68778	3.94339	0	69125	3.90536	0		68199	4.00864	0	68656	3.95621	0
68798	3.94565	0	69145	3.90759	0		68219	4.01096	0	68676	3.95848	0
68818	3.94791	0	69165	3.90981	0		68239	4.01327	0	68696	3.96075	0
68838	3.95017	0	69185	3.91204	0		68259	4.01559	0	68716	3.96302	0
68858	3.95243	0	69205	3.91427	0		68279	4.0179	0	68736	3.96529	0
68878	3.95469	0	69225	3.91649	0		68299	4.02022	0	68756	3.96756	0
68898	3.95695	0	69245	3.91872	0		68319	4.02254	0	68776	3.96983	0
68918	3.95921	0	69265	3.92095	0		68339	4.02486	0	68796	3.97211	0
68938	3.96148	0	69285	3.92318	0		68359	4.02718	0	68816	3.97438	0
68958	3.96374	0	69305	3.92541	0		68379	4.0295	0	68836	3.97666	0
68978	3.966	0	69325	3.92764	0		68399	4.03182	0	68856	3.97893	0
68998	3.96827	0	69345	3.92988	0		68419	4.03414	0	68876	3.98121	0
69018	3.97053	0	69365	3.93211	0		68439	4.03646	0	68896	3.98348	0
69038	3.9728	0	69385	3.93434	0		68459	4.03878	0	68916	3.98576	0
69058	3.97506	0	69405	3.93658	0		68479	4.04111	0	68936	3.98804	0
69078	3.97733	0	69425	3.93881	0		68499	4.04343	0	68956	3.99032	0
69098	3.9796	0	69445	3.94104	0		68519	4.04576	0	68976	3.9926	0
69118	3.98187	0	69465	3.94328	0		68539	4.04808	0	68996	3.99488	0
69138	3.98414	0	69485	3.94552	0		68559	4.05041	0	69016	3.99716	0
69158	3.98641	0	69505	3.94775	0		68579	4.05274	0	69036	3.99944	0
69178	3.98868	0	69525	3.94999	0		68599	4.05506	0	69056	4.00172	0
69198	3.99095	0	69545	3.95223	0		68619	4.05739	0	69076	4.004	0
69218	3.99322	0	69565	3.95447	0		68639	4.05972	0	69096	4.00629	0
69238	3.9955	0	69585	3.95671	0		68659	4.06205	0	69116	4.00857	0
69258	3.99777	0	69605	3.95895	0		68679	4.06438	0	69136	4.01085	0
69278	4.00004	0	69625	3.96119	0		68699	4.06671	0	69156	4.01314	0
69298	4.00232	0	69645	3.96343	0		68719	4.06904	0	69176	4.01542	0
69318	4.00459	0	69665	3.96567	0		68739	4.07137	0	69196	4.01771	0
69338	4.00687	0	69685	3.96792	0		68759	4.07371	0	69216	4.02	0
69358	4.00914	0	69705	3.97016	0		68779	4.07604	0	69236	4.02229	0
69378	4.01142	0	69725	3.9724	0		68799	4.07838	0	69256	4.02457	0
69398	4.0137	0	69745	3.97465	0		68819	4.08071	0	69276	4.02686	0
69418	4.01598	0	69765	3.97689	0		68839	4.08305	0	69296	4.02915	0
69438	4.01826	0	69785	3.97914	0		68859	4.08538	0	69316	4.03144	0
69458	4.02054	0	69805	3.98138	0		68879	4.08772	0	69336	4.03373	0
69478	4.02282	0	69825	3.98363	0		68899	4.09006	0	69356	4.03603	0
69498	4.0251	0	69845	3.98588	0		68919	4.09239	0	69376	4.03832	0
69518	4.02738	0	69865	3.98813	0		68939	4.09473	1	69396	4.04061	0
69538	4.02966	0	69885	3.99038	0		68959	4.09707	0	69416	4.0429	0
69558	4.03194	0	69905	3.99263	0		68979	4.09941	0	69436	4.0452	0
69578	4.03423	0	69925	3.99488	0		68999	4.10175	0	69456	4.04749	0
69598	4.03651	0	69945	3.99713	0		69019	4.10409	0	69476	4.04979	0
69618	4.0388	0	69965	3.99938	0		69039	4.10644	0	69496	4.05208	0
69638	4.04108	0	69985	4.00163	0		69059	4.10878	0	69516	4.05438	0
69658	4.04337	0	70005	4.00389	0		69079	4.11112	0	69536	4.05668	0
69678	4.04565	0	70025	4.00614	0		69099	4.11347	0	69556	4.05898	0
69698	4.04794	0	70045	4.00839	0		69119	4.11581	0	69576	4.06128	0
69718	4.05023	0	70065	4.01065	0		69139	4.11816	0	69596	4.06358	0
69738	4.05252	0	70085	4.0129	0		69159	4.1205	0	69616	4.06588	0
69758	4.05481	0	70105	4.01516	0		69179	4.12285	0	69636	4.06818	0
69778	4.0571	0	70125	4.01741	0		69199	4.1252	0	69656	4.07048	0
69798	4.05939	0	70145	4.01967	0		69219	4.12755	0	69676	4.07278	0
69818	4.06168	0	70165	4.02193	0		69239	4.1299	0	69696	4.07508	0
69838	4.06397	0	70185	4.02419	0		69259	4.13224	0	69716	4.07738	0
69858	4.06626	0	70205	4.02645	0		69279	4.1346	0	69736	4.07969	0
69878	4.06856	0	70225	4.02871	0		69299	4.13694	0	69756	4.08199	0
69898	4.07085	0	70245	4.03097	0		69319	4.1393	0	69776	4.0843	0
69918	4.07315	0	70265	4.03323	0		69339	4.14165	0	69796	4.0866	0
69938	4.07544	0	70285	4.03549	0		69359	4.144	0	69816	4.08891	0
69958	4.07774	0	70305	4.03775	0		69379	4.14636	0	69836	4.09122	0
69978	4.08003	0	70325	4.04002	0		69399	4.14871	0	69856	4.09353	0
69998	4.08233	0	70345	4.04228	0		69419	4.15107	0	69876	4.09583	0
70018	4.08463	0	70365	4.04454	0		69439	4.15342	0	69896	4.09814	0
70038	4.08693	0	70385	4.04681	0		69459	4.15578	0	69916	4.10045	0
70058	4.08923	0	70405	4.04907	0		69479	4.15813	0	69936	4.10276	0
70078	4.09152	0	70425	4.05134	0		69499	4.16049	0	69956	4.10508	0
70098	4.09383	0	70445	4.05361	0		69519	4.16285	0	69976	4.10739	0
70118	4.09613	0	70465	4.05588	0		69539	4.16521	0	69996	4.1097	0
70138	4.09843	0	70485	4.05814	0		69559	4.16757	0	70016	4.11201	0
70158	4.10073	0	70505	4.06041	0		69579	4.16993	0	70036	4.11433	0
70178	4.10303	0	70525	4.06268	0		69599	4.17229	0	70056	4.11664	0
70198	4.10534	0	70545	4.06495	0		69619	4.17465	0	70076	4.11895	0
70218	4.10764	0	70565	4.06722	0		69639	4.17701	0	70096	4.12127	0
70238	4.10995	0	70585	4.06949	0		69659	4.17938	0	70116	4.12359	0
70258	4.11225	0	70605	4.07176	0		69679	4.18174	0	70136	4.1259	0
70278	4.11456	0	70625	4.07404	0		69699	4.1841	0	70156	4.12822	0
70298	4.11686	0	70645	4.07631	0		69719	4.18647	0	70176	4.13054	0
70318	4.11917	0	70665	4.07858	0		69739	4.18883	0	70196	4.13286	0
70338	4.12148	0	70685	4.08086	0		69759	4.1912	0	70216	4.13518	0
70358	4.12379	0	70705	4.08313	0		69779	4.19357	0	70236	4.1375	0
70378	4.1261	0	70725	4.08541	0		69799	4.19593	0	70256	4.13982	0
70398	4.12841	0	70745	4.08768	0		69819	4.1983	0	70276	4.14214	0
70418	4.13072	0	70765	4.08996	0		69839	4.20067	0	70296	4.14446	0
70438	4.13303	0	70785	4.09224	0		69859	4.20304	0	70316	4.14679	0
70458	4.13534	0	70805	4.09452	0		69879	4.20541	0	70336	4.14911	0
70478	4.13765	0	70825	4.0968	0		69899	4.20778	0	70356	4.15143	0
70498	4.13997	0	70845	4.09908	0		69919	4.21015	0	70376	4.15376	0
70518	4.14228	0	70865	4.10136	0		69939	4.21253	1	70396	4.15608	0
70538	4.1446	0	70885	4.10364	0		69959	4.2149	0	70416	4.15841	0
70558	4.14691	0	70905	4.10592	0		69979	4.21727	0	70436	4.16074	0
70578	4.14923	0	70925	4.1082	0		69999	4.21965	0	70456	4.16306	0
70598	4.15154	0	70945	4.11048	0		70019	4.22202	0	70476	4.16539	0
70618	4.15386	0	70965	4.11277	0		70039	4.2244	0	70496	4.16772	0
70638	4.15618	0	70985	4.11505	0		70059	4.22677	0	70516	4.17005	0
70658	4.1585	0	71005	4.11733	0		70079	4.22915	0	70536	4.17238	0
70678	4.16082	0	71025	4.11962	0		70099	4.23153	0	70556	4.17471	0
70698	4.16314	0	71045	4.1219	0		70119	4.23391	0	70576	4.17704	0
70718	4.16546	0	71065	4.12419	0		70139	4.23628	0	70596	4.17937	0
70738	4.16778	0	71085	4.12648	0		70159	4.23866	0	70616	4.18171	0
70758	4.1701	0	71105	4.12877	0		70179	4.24104	0	70636	4.18404	0
70778	4.17242	0	71125	4.13105	0		70199	4.24343	0	70656	4.18637	0
70798	4.17474	0	71145	4.13334	0		70219	4.24581	0	70676	4.18871	0
70818	4.17707	0	71165	4.13563	0		70239	4.24819	0	70696	4.19104	0
70838	4.17939	0	71185	4.13792	0		70259	4.25057	0	70716	4.19338	0
70858	4.18172	0	71205	4.14022	0		70279	4.25296	0	70736	4.19571	0
70878	4.18404	0	71225	4.14251	0		70299	4.25534	0	70756	4.19805	0
70898	4.18637	0	71245	4.1448	0		70319	4.25772	0	70776	4.20039	0
70918	4.1887	0	71265	4.14709	0		70339	4.26011	0	70796	4.20273	0
70938	4.19102	0	71285	4.14938	0		70359	4.2625	0	70816	4.20507	0
70958	4.19335	0	71305	4.15168	0		70379	4.26488	0	70836	4.20741	0
70978	4.19568	0	71325	4.15397	0		70399	4.26727	0	70856	4.20975	0
70998	4.19801	0	71345	4.15627	0		70419	4.26966	0	70876	4.21209	0
71018	4.20034	0	71365	4.15856	0		70439	4.27205	0	70896	4.21443	0
71038	4.20267	0	71385	4.16086	0		70459	4.27444	0	70916	4.21677	0
71058	4.205	0	71405	4.16316	0		70479	4.27683	0	70936	4.21912	0
71078	4.20733	0	71425	4.16546	0		70499	4.27922	0	70956	4.22146	0
71098	4.20967	0	71445	4.16775	0		70519	4.28161	0	70976	4.2238	0
71118	4.212	0	71465	4.17005	0		70539	4.284	0	70996	4.22615	0
71138	4.21433	0	71485	4.17235	0		70559	4.2864	0	71016	4.22849	0
71158	4.21667	0	71505	4.17465	0		70579	4.28879	0	71036	4.23084	0
71178	4.219	0	71525	4.17696	0		70599	4.29118	0	71056	4.23319	0
71198	4.22134	0	71545	4.17926	0		70619	4.29358	0	71076	4.23553	0
71218	4.22368	0	71565	4.18156	0		70639	4.29597	0	71096	4.23788	0
71238	4.22601	0	71585	4.18386	0		70659	4.29837	0	71116	4.24023	0
71258	4.22835	0	71605	4.18616	0		70679	4.30077	0	71136	4.24258	0
71278	4.23069	0	71625	4.18847	0		70699	4.30316	0	71156	4.24493	0
71298	4.23303	0	71645	4.19077	0		70719	4.30556	0	71176	4.24728	0
71318	4.23537	0	71665	4.19308	0		70739	4.30796	0	71196	4.24963	0
71338	4.23771	0	71685	4.19539	0		70759	4.31036	0	71216	4.25199	0
71358	4.24005	0	71705	4.19769	0		70779	4.31276	0	71236	4.25434	0
71378	4.24239	0	71725	4.2	0		70799	4.31516	0	71256	4.25669	0
71398	4.24474	0	71745	4.20231	0		70819	4.31757	0	71276	4.25905	0
71418	4.24708	0	71765	4.20462	0		70839	4.31997	0	71296	4.2614	0
71438	4.24942	0	71785	4.20693	0		70859	4.32237	1	71316	4.26375	0
71458	4.25176	0	71805	4.20923	0		70879	4.32477	0	71336	4.26611	0
71478	4.25411	0	71825	4.21155	0		70899	4.32718	0	71356	4.26847	0
71498	4.25646	0	71845	4.21386	0		70919	4.32958	0	71376	4.27083	0
71518	4.2588	0	71865	4.21617	0		70939	4.33199	0	71396	4.27318	0
71538	4.26115	0	71885	4.21848	0		70959	4.33439	0	71416	4.27554	0
71558	4.2635	0	71905	4.22079	0		70979	4.3368	0	71436	4.2779	0
71578	4.26584	0	71925	4.22311	0		70999	4.33921	0	71456	4.28026	0
71598	4.26819	0	71945	4.22542	0		71019	4.34162	0	71476	4.28262	0
71618	4.27054	0	71965	4.22774	0		71039	4.34403	0	71496	4.28498	0
71638	4.27289	0	71985	4.23005	0		71059	4.34644	0	71516	4.28735	0
71658	4.27524	0	72005	4.23237	0		71079	4.34885	0	71536	4.28971	0
71678	4.27759	0	72025	4.23469	0		71099	4.35126	0	71556	4.29207	0
71698	4.27995	0	72045	4.237	0		71119	4.35367	0	71576	4.29443	0
71718	4.2823	0	72065	4.23932	0		71139	4.35608	0	71596	4.2968	0
71738	4.28465	0	72085	4.24164	0		71159	4.35849	0	71616	4.29916	0
71758	4.28701	0	72105	4.24396	0		71179	4.36091	0	71636	4.30153	0
71778	4.28936	0	72125	4.24628	0		71199	4.36332	0	71656	4.3039	0
71798	4.29172	0	72145	4.2486	0		71219	4.36574	0	71676	4.30626	0
71818	4.29407	0	72165	4.25092	0		71239	4.36815	0	71696	4.30863	0
71838	4.29643	0	72185	4.25324	0		71259	4.37057	0	71716	4.311	0
71858	4.29879	0	72205	4.25557	0		71279	4.37299	0	71736	4.31337	0
71878	4.30114	0	72225	4.25789	0		71299	4.3754	0	71756	4.31574	0
71898	4.3035	0	72245	4.26021	0		71319	4.37782	0	71776	4.31811	0
71918	4.30586	0	72265	4.26254	0		71339	4.38024	0	71796	4.32048	0
71938	4.30822	0	72285	4.26486	0		71359	4.38266	0	71816	4.32285	0
71958	4.31058	1	72305	4.26719	0		71379	4.38508	0	71836	4.32522	0
71978	4.31294	0	72325	4.26952	0		71399	4.3875	0	71856	4.3276	0
71998	4.31531	0	72345	4.27184	0		71419	4.38992	0	71876	4.32997	0
72018	4.31767	0	72365	4.27417	0		71439	4.39235	0	71896	4.33234	0
72038	4.32003	0	72385	4.2765	0		71459	4.39477	0	71916	4.33472	0
72058	4.3224	0	72405	4.27883	0		71479	4.39719	0	71936	4.33709	0
72078	4.32476	0	72425	4.28116	0		71499	4.39962	0	71956	4.33947	0
72098	4.32712	0	72445	4.28349	0		71519	4.40204	0	71976	4.34185	0
72118	4.32949	0	72465	4.28582	0		71539	4.40447	0	71996	4.34422	0
72138	4.33186	0	72485	4.28815	0		71559	4.40689	0	72016	4.3466	0
72158	4.33422	0	72505	4.29048	0		71579	4.40932	0	72036	4.34898	0
72178	4.33659	0	72525	4.29281	0		71599	4.41175	0	72056	4.35136	0
72198	4.33896	0	72545	4.29515	0		71619	4.41418	0	72076	4.35374	0
72218	4.34133	0	72565	4.29748	0		71639	4.41661	0	72096	4.35612	0
72238	4.3437	0	72585	4.29981	0		71659	4.41904	0	72116	4.3585	0
72258	4.34607	0	72605	4.30215	0		71679	4.42147	0	72136	4.36088	0
72278	4.34844	0	72625	4.30449	0		71699	4.4239	0	72156	4.36327	0
72298	4.35081	0	72645	4.30682	0		71719	4.42633	0	72176	4.36565	0
72318	4.35318	0	72665	4.30916	0		71739	4.42876	0	72196	4.36803	0
72338	4.35555	0	72685	4.3115	0		71759	4.43119	0	72216	4.37042	0
72358	4.35793	0	72705	4.31384	0		71779	4.43363	0	72236	4.3728	0
72378	4.3603	0	72725	4.31618	0		71799	4.43606	0	72256	4.37519	0
72398	4.36268	0	72745	4.31851	0		71819	4.4385	0	72276	4.37758	0
72418	4.36505	1	72765	4.32085	0		71839	4.44093	0	72296	4.37996	0
72438	4.36743	0	72785	4.3232	0		71859	4.44337	0	72316	4.38235	0
72458	4.36981	0	72805	4.32554	0		71879	4.44581	0	72336	4.38474	0
72478	4.37218	0	72825	4.32788	0		71899	4.44824	0	72356	4.38713	0
72498	4.37456	0	72845	4.33022	0		71919	4.45068	0	72376	4.38952	0
72518	4.37694	0	72865	4.33257	0		71939	4.45312	0	72396	4.39191	0
72538	4.37932	0	72885	4.33491	0		71959	4.45556	0	72416	4.3943	0
72558	4.3817	0	72905	4.33725	0		71979	4.458	0	72436	4.39669	0
72578	4.38408	0	72925	4.3396	0		71999	4.46044	0	72456	4.39909	0
72598	4.38646	0	72945	4.34195	0		72019	4.46288	0	72476	4.40148	0
72618	4.38884	0	72965	4.34429	0		72039	4.46533	0	72496	4.40387	0
72638	4.39122	0	72985	4.34664	0		72059	4.46777	0	72516	4.40627	0
72658	4.39361	0	73005	4.34899	0		72079	4.47021	0	72536	4.40866	0
72678	4.39599	0	73025	4.35134	0		72099	4.47266	0	72556	4.41106	0
72698	4.39837	0	73045	4.35369	0		72119	4.4751	1	72576	4.41345	0
72718	4.40076	0	73065	4.35604	0		72139	4.47755	0	72596	4.41585	0
72738	4.40315	0	73085	4.35839	0		72159	4.47999	0	72616	4.41825	0
72758	4.40553	0	73105	4.36074	0		72179	4.48244	0	72636	4.42065	1
72778	4.40792	0	73125	4.36309	0		72199	4.48489	0	72656	4.42305	0
72798	4.41031	0	73145	4.36544	0		72219	4.48734	0	72676	4.42544	0
72818	4.41269	0	73165	4.3678	0		72239	4.48979	0	72696	4.42784	0
72838	4.41508	0	73185	4.37015	0		72259	4.49224	0	72716	4.43025	0
72858	4.41747	0	73205	4.3725	0		72279	4.49469	0	72736	4.43265	0
72878	4.41986	0	73225	4.37486	0		72299	4.49714	0	72756	4.43505	0
72898	4.42225	0	73245	4.37721	0		72319	4.49959	0	72776	4.43745	1
72918	4.42464	0	73265	4.37957	0		72339	4.50204	0	72796	4.43986	0
72938	4.42704	0	73285	4.38193	0		72359	4.5045	0	72816	4.44226	0
72958	4.42943	0	73305	4.38428	0		72379	4.50695	0	72836	4.44466	0
72978	4.43182	0	73325	4.38664	0		72399	4.5094	0	72856	4.44707	0
72998	4.43422	0	73345	4.389	0		72419	4.51186	0	72876	4.44948	0
73018	4.43661	0	73365	4.39136	0		72439	4.51431	0	72896	4.45188	0
73038	4.43901	0	73385	4.39372	0		72459	4.51677	0	72916	4.45429	0
73058	4.4414	0	73405	4.39608	0		72479	4.51923	0	72936	4.4567	0
73078	4.4438	0	73425	4.39844	0		72499	4.52169	0	72956	4.45911	0
73098	4.4462	0	73445	4.4008	0		72519	4.52414	0	72976	4.46152	0
73118	4.4486	0	73465	4.40317	0		72539	4.5266	0	72996	4.46393	0
73138	4.45099	0	73485	4.40553	0		72559	4.52906	0	73016	4.46634	0
73158	4.45339	0	73505	4.40789	0		72579	4.53152	0	73036	4.46875	0
73178	4.45579	0	73525	4.41026	0		72599	4.53399	0	73056	4.47116	0
73198	4.45819	0	73545	4.41262	0		72619	4.53645	0	73076	4.47357	0
73218	4.46059	0	73565	4.41499	0		72639	4.53891	0	73096	4.47599	0
73238	4.463	0	73585	4.41735	0		72659	4.54137	0	73116	4.4784	0
73258	4.4654	0	73605	4.41972	0		72679	4.54384	0	73136	4.48081	0
73278	4.4678	0	73625	4.42209	0		72699	4.5463	0	73156	4.48323	0
73298	4.47021	0	73645	4.42446	0		72719	4.54877	0	73176	4.48565	0
73318	4.47261	0	73665	4.42683	0		72739	4.55123	0	73196	4.48806	0
73338	4.47502	0	73685	4.42919	0		72759	4.5537	0	73216	4.49048	0
73358	4.47742	0	73705	4.43156	0		72779	4.55617	0	73236	4.4929	0
73378	4.47983	0	73725	4.43394	0		72799	4.55863	0	73256	4.49532	0
73398	4.48224	0	73745	4.43631	0		72819	4.5611	0	73276	4.49774	0
73418	4.48464	0	73765	4.43868	0		72839	4.56357	0	73296	4.50016	0
73438	4.48705	0	73785	4.44105	0		72859	4.56604	0	73316	4.50258	0
73458	4.48946	0	73805	4.44343	0		72879	4.56851	0	73336	4.505	0
73478	4.49187	0	73825	4.4458	0		72899	4.57098	0	73356	4.50742	0
73498	4.49428	0	73845	4.44817	0		72919	4.57345	0	73376	4.50984	0
73518	4.49669	0	73865	4.45055	0		72939	4.57593	0	73396	4.51226	0
73538	4.4991	0	73885	4.45292	0		72959	4.5784	0	73416	4.51469	0
73558	4.50152	0	73905	4.4553	0		72979	4.58087	0	73436	4.51711	0
73578	4.50393	0	73925	4.45768	0		72999	4.58335	0	73456	4.51954	0
73598	4.50634	0	73945	4.46006	0		73019	4.58582	0	73476	4.52196	0
73618	4.50875	0	73965	4.46244	0		73039	4.5883	0	73496	4.52439	0
73638	4.51117	0	73985	4.46481	0		73059	4.59077	0	73516	4.52682	0
73658	4.51358	0	74005	4.46719	0		73079	4.59325	0	73536	4.52924	0
73678	4.516	0	74025	4.46957	0		73099	4.59573	0	73556	4.53167	0
73698	4.51842	0	74045	4.47195	0		73119	4.59821	0	73576	4.5341	0
73718	4.52083	0	74065	4.47434	0		73139	4.60069	0	73596	4.53653	0
73738	4.52325	0	74085	4.47672	0		73159	4.60317	0	73616	4.53896	0
73758	4.52567	0	74105	4.4791	0		73179	4.60565	0	73636	4.54139	0
73778	4.52809	0	74125	4.48148	0		73199	4.60813	0	73656	4.54382	0
73798	4.53051	0	74145	4.48387	0		73219	4.61061	0	73676	4.54625	0
73818	4.53293	0	74165	4.48625	0		73239	4.61309	0	73696	4.54869	0
73838	4.53535	0	74185	4.48864	0		73259	4.61558	0	73716	4.55112	0
73858	4.53777	0	74205	4.49102	0		73279	4.61806	0	73736	4.55356	0
73878	4.5402	0	74225	4.49341	0		73299	4.62054	0	73756	4.55599	0
73898	4.54262	0	74245	4.4958	0		73319	4.62303	0	73776	4.55842	0
73918	4.54504	0	74265	4.49819	0		73339	4.62552	0	73796	4.56086	0
73938	4.54747	0	74285	4.50057	0		73359	4.628	0	73816	4.5633	0
73958	4.54989	0	74305	4.50296	0		73379	4.63049	0	73836	4.56574	0
[truncated: 46,330 more rows]
